# Supplementary material for: Natural variation in sugar tolerance associates with changes in signaling and mitochondrial ribosome biogenesis
Source: eLife. 2018 Nov 27;7:e40841. doi: 10.7554/eLife.40841 (PMC6301794; doi:10.7554/eLife.40841)
Supplement: Figure 1—source data 1. [file elife-40841-fig1-data1.xlsx]

## Sheet: Sheet1
Species	Yeast (%)	Sucrose (%)	Replicate	Median Time to pupation (h after egg-laying)	Larval Survival	Pupariation Index
simulans	1.25	0	1		0	0
simulans	1.25	0	2		0	0
simulans	1.25	0	3		0	0
simulans	1.25	0	4		0	0
simulans	1.25	0	5		0	0
simulans	2.5	0	1		0	0
simulans	2.5	0	2		0	0
simulans	2.5	0	3		0	0
simulans	2.5	0	4		0	0
simulans	2.5	0	5		0	0
simulans	5	0	1	240	0.433333	0.0454545
simulans	5	0	2	216	0.366667	0.0352564
simulans	5	0	3	216	0.433333	0.0492424
simulans	5	0	4	240	0.3	0.0340909
simulans	5	0	5	216	0.433333	0.0509259
simulans	10	0	1	144	0.766667	0.119048
simulans	10	0	2	168	0.633333	0.107143
simulans	10	0	3	144	0.766667	0.136905
simulans	10	0	4	144	0.666667	0.119048
simulans	10	0	5	144	0.666667	0.119048
simulans	20	0	1	120	0.733333	0.152778
simulans	20	0	2	144	0.8	0.166667
simulans	20	0	3	144	0.866667	0.180556
simulans	20	0	4	144	0.9	0.180556
simulans	20	0	5	144	0.7	0.131944
simulans	1.25	5	1		0	0
simulans	1.25	5	2		0	0
simulans	1.25	5	3		0	0
simulans	1.25	5	4		0	0
simulans	1.25	5	5		0	0
simulans	2.5	5	1		0	0
simulans	2.5	5	2		0.0333333	0.00245098
simulans	2.5	5	3		0.0333333	0.00245098
simulans	2.5	5	4		0	0
simulans	2.5	5	5		0	0
simulans	5	5	1	240	0.3	0.03125
simulans	5	5	2	240	0.333333	0.0320513
simulans	5	5	3	276	0.2	0.0208333
simulans	5	5	4	264	0.466667	0.0486111
simulans	5	5	5	264	0.333333	0.0297619
simulans	10	5	1	168	0.666667	0.113095
simulans	10	5	2	168	0.633333	0.107143
simulans	10	5	3	168	0.733333	0.125
simulans	10	5	4	168	0.566667	0.0740741
simulans	10	5	5	168	0.833333	0.142857
simulans	20	5	1	120	0.7	0.145833
simulans	20	5	2	144	0.9	0.1875
simulans	20	5	3	144	0.933333	0.1875
simulans	20	5	4	144	0.966667	0.180556
simulans	20	5	5	144	0.933333	0.194444
simulans	1.25	10	1		0	0
simulans	1.25	10	2		0	0
simulans	1.25	10	3		0	0
simulans	1.25	10	4		0	0
simulans	1.25	10	5		0	0
simulans	2.5	10	1		0	0
simulans	2.5	10	2		0	0
simulans	2.5	10	3		0	0
simulans	2.5	10	4		0	0
simulans	2.5	10	5		0	0
simulans	5	10	1	312	0.3	0.025
simulans	5	10	2	276	0.2	0.0208333
simulans	5	10	3	288	0.3	0.0288462
simulans	5	10	4		0	0
simulans	5	10	5	324	0.0666667	0.00595238
simulans	10	10	1	168	0.933333	0.145833
simulans	10	10	2	192	0.733333	0.09375
simulans	10	10	3	168	0.933333	0.145833
simulans	10	10	4	168	0.766667	0.119792
simulans	10	10	5	168	0.866667	0.114583
simulans	20	10	1	144	0.7	0.138889
simulans	20	10	2	144	0.833333	0.138889
simulans	20	10	3	144	0.7	0.125
simulans	20	10	4	144	0.733333	0.131944
simulans	20	10	5	144	0.733333	0.138889
simulans	1.25	15	1		0	0
simulans	1.25	15	2		0	0
simulans	1.25	15	3		0	0
simulans	1.25	15	4		0	0
simulans	1.25	15	5		0	0
simulans	2.5	15	1		0	0
simulans	2.5	15	2		0	0
simulans	2.5	15	3		0	0
simulans	2.5	15	4		0	0
simulans	2.5	15	5		0	0
simulans	5	15	1	336	0.1	0.00833333
simulans	5	15	2	336	0.0333333	0.00297619
simulans	5	15	3	384	0.0333333	0.00260417
simulans	5	15	4	264	0.0333333	0.00378788
simulans	5	15	5	336	0.1	0.00892857
simulans	10	15	1	192	0.8	0.114583
simulans	10	15	2	192	0.7	0.0989583
simulans	10	15	3	192	0.666667	0.09375
simulans	10	15	4	192	0.7	0.104167
simulans	10	15	5	192	0.766667	0.114583
simulans	20	15	1	156	0.866667	0.154762
simulans	20	15	2	168	0.833333	0.142857
simulans	20	15	3	144	0.833333	0.14881
simulans	20	15	4	168	0.8	0.142857
simulans	20	15	5	168	0.8	0.142857
simulans	1.25	20	1		0	0
simulans	1.25	20	2		0	0
simulans	1.25	20	3		0	0
simulans	1.25	20	4		0	0
simulans	1.25	20	5		0	0
simulans	2.5	20	1		0	0
simulans	2.5	20	2		0	0
simulans	2.5	20	3		0	0
simulans	2.5	20	4		0	0
simulans	2.5	20	5		0	0
simulans	5	20	1		0	0
simulans	5	20	2	360	0.0666667	0.00555556
simulans	5	20	3		0	0
simulans	5	20	4		0	0
simulans	5	20	5	312	0.0666667	0.00641026
simulans	10	20	1	216	0.833333	0.106481
simulans	10	20	2	216	0.666667	0.0925926
simulans	10	20	3	216	0.733333	0.0916667
simulans	10	20	4	216	0.466667	0.0648148
simulans	10	20	5	216	0.766667	0.101852
simulans	20	20	1	168	0.666667	0.107143
simulans	20	20	2	168	0.833333	0.130208
simulans	20	20	3	168	0.9	0.140625
simulans	20	20	4	168	0.833333	0.130208
simulans	20	20	5	168	0.8	0.125
sechellia	1.25	0	1		0	0
sechellia	1.25	0	2		0	0
sechellia	1.25	0	3		0	0
sechellia	1.25	0	4	312	0.0333333	0.00320513
sechellia	1.25	0	5		0	0
sechellia	2.5	0	1	264	0.366667	0.0381944
sechellia	2.5	0	2	264	0.566667	0.0472222
sechellia	2.5	0	3	264	0.466667	0.0451389
sechellia	2.5	0	4	240	0.5	0.0492424
sechellia	2.5	0	5	288	0.5	0.0386905
sechellia	5	0	1	192	1	0.145833
sechellia	5	0	2	168	0.6	0.0740741
sechellia	5	0	3	192	0.6	0.0787037
sechellia	5	0	4	192	0.466667	0.0486111
sechellia	5	0	5	180	0.4	0.0625
sechellia	10	0	1	168	0.9	0.154762
sechellia	10	0	2	168	0.833333	0.113095
sechellia	10	0	3	192	0.933333	0.145833
sechellia	10	0	4	144	0.9	0.166667
sechellia	10	0	5	168	0.733333	0.109375
sechellia	20	0	1	168	0.8	0.125
sechellia	20	0	2	144	0.7	0.131944
sechellia	20	0	3	168	0.7	0.109375
sechellia	20	0	4	168	0.866667	0.154762
sechellia	20	0	5	168	0.666667	0.113095
sechellia	1.25	5	1		0	0
sechellia	1.25	5	2		0	0
sechellia	1.25	5	3		0	0
sechellia	1.25	5	4		0	0
sechellia	1.25	5	5		0	0
sechellia	2.5	5	1	288	0.0666667	0.00694444
sechellia	2.5	5	2	288	0.333333	0.0297619
sechellia	2.5	5	3	288	0.2	0.0178571
sechellia	2.5	5	4	288	0.233333	0.0208333
sechellia	2.5	5	5	264	0.233333	0.0224359
sechellia	5	5	1	192	0.4	0.0555556
sechellia	5	5	2	192	0.533333	0.0648148
sechellia	5	5	3	192	0.533333	0.0729167
sechellia	5	5	4	192	0.5	0.0625
sechellia	5	5	5	192	0.5	0.0568182
sechellia	10	5	1	168	1	0.15625
sechellia	10	5	2	168	0.966667	0.151042
sechellia	10	5	3	144	0.733333	0.109375
sechellia	10	5	4	192	0.733333	0.114583
sechellia	10	5	5	168	0.6	0.09375
sechellia	20	5	1	168	0.9	0.135417
sechellia	20	5	2	168	0.5	0.078125
sechellia	20	5	3	168	0.833333	0.119792
sechellia	20	5	4	168	0.866667	0.130208
sechellia	20	5	5	168	0.766667	0.119792
sechellia	1.25	10	1		0	0
sechellia	1.25	10	2		0	0
sechellia	1.25	10	3		0	0
sechellia	1.25	10	4		0	0
sechellia	1.25	10	5		0	0
sechellia	2.5	10	1		0	0
sechellia	2.5	10	2	360	0.0666667	0.00555556
sechellia	2.5	10	3	360	0.1	0.00833333
sechellia	2.5	10	4	288	0.0333333	0.00347222
sechellia	2.5	10	5	312	0.0666667	0.00641026
sechellia	5	10	1	216	0.2	0.025
sechellia	5	10	2	216	0.366667	0.0458333
sechellia	5	10	3	264	0.366667	0.0381944
sechellia	5	10	4	192	0.433333	0.046875
sechellia	5	10	5	192	0.466667	0.0492424
sechellia	10	10	1	216	0.6	0.0740741
sechellia	10	10	2	192	0.5	0.0694444
sechellia	10	10	3	240	0.633333	0.0681818
sechellia	10	10	4	240	0.366667	0.0416667
sechellia	10	10	5	192	0.633333	0.0833333
sechellia	20	10	1	180	0.0666667	0.0104167
sechellia	20	10	2	216	0.466667	0.0583333
sechellia	20	10	3	216	0.166667	0.0208333
sechellia	20	10	4	216	0.6	0.0833333
sechellia	20	10	5	192	0.5	0.078125
sechellia	1.25	15	1		0	0
sechellia	1.25	15	2		0	0
sechellia	1.25	15	3		0	0
sechellia	1.25	15	4		0	0
sechellia	1.25	15	5		0	0
sechellia	2.5	15	1		0	0
sechellia	2.5	15	2	336	0.0333333	0.00297619
sechellia	2.5	15	3		0	0
sechellia	2.5	15	4		0	0
sechellia	2.5	15	5		0	0
sechellia	5	15	1	228	0.4	0.0384615
sechellia	5	15	2	288	0.433333	0.0451389
sechellia	5	15	3	264	0.3	0.0340909
sechellia	5	15	4	264	0.533333	0.0606061
sechellia	5	15	5	264	0.466667	0.0492424
sechellia	10	15	1	372	0.133333	0.00980392
sechellia	10	15	2	372	0.266667	0.0196078
sechellia	10	15	3	336	0.266667	0.0196078
sechellia	10	15	4	336	0.233333	0.0208333
sechellia	10	15	5	300	0.2	0.0166667
sechellia	20	15	1		0	0
sechellia	20	15	2	312	0.133333	0.0119048
sechellia	20	15	3		0	0
sechellia	20	15	4		0	0
sechellia	20	15	5	252	0.0666667	0.00757576
sechellia	1.25	20	1		0	0
sechellia	1.25	20	2		0	0
sechellia	1.25	20	3		0	0
sechellia	1.25	20	4		0	0
sechellia	1.25	20	5		0	0
sechellia	2.5	20	1		0	0
sechellia	2.5	20	2		0	0
sechellia	2.5	20	3		0	0
sechellia	2.5	20	4		0	0
sechellia	2.5	20	5		0	0
sechellia	5	20	1	312	0.266667	0.025641
sechellia	5	20	2		0	0
sechellia	5	20	3	300	0.466667	0.0416667
sechellia	5	20	4	288	0.466667	0.0416667
sechellia	5	20	5	288	0.466667	0.0388889
sechellia	10	20	1		0	0
sechellia	10	20	2		0	0
sechellia	10	20	3		0	0
sechellia	10	20	4	312	0.0333333	0.00320513
sechellia	10	20	5		0	0
sechellia	20	20	1		0	0
sechellia	20	20	2		0	0
sechellia	20	20	3		0	0
sechellia	20	20	4		0	0
sechellia	20	20	5		0	0
