# Supplementary material for: Natural variation in sugar tolerance associates with changes in signaling and mitochondrial ribosome biogenesis
Source: eLife. 2018 Nov 27;7:e40841. doi: 10.7554/eLife.40841 (PMC6301794; doi:10.7554/eLife.40841)
Supplement: Figure 1—source data 2. [file elife-40841-fig1-data2.xlsx]

## Sheet: Sheet1
Species	Yeast (%)	Sucrose (%)	Replicate	Pupariation Time (h after egg-laying)	Larval Survival	Pupariation Index
F1 hybrid	1.25	0	1		0	0
F1 hybrid	1.25	0	2		0	0
F1 hybrid	1.25	0	3	336	0.0333333	0.00297619
F1 hybrid	1.25	0	4	360	0.0333333	0.00277778
F1 hybrid	1.25	0	5	336	0.0333333	0.00297619
F1 hybrid	2.5	0	1	240	0.366667	0.0305556
F1 hybrid	2.5	0	2	240	0.3	0.0243056
F1 hybrid	2.5	0	3	264	0.266667	0.0238095
F1 hybrid	2.5	0	4	300	0.2	0.015625
F1 hybrid	2.5	0	5	288	0.3	0.0288462
F1 hybrid	5	0	1	240	0.633333	0.0565476
F1 hybrid	5	0	2	192	0.433333	0.0555556
F1 hybrid	5	0	3	204	0.333333	0.0416667
F1 hybrid	5	0	4	192	0.533333	0.0648148
F1 hybrid	5	0	5	192	0.5	0.0601852
F1 hybrid	10	0	1	132	1	0.178571
F1 hybrid	10	0	2	120	0.866667	0.154762
F1 hybrid	10	0	3	144	0.966667	0.194444
F1 hybrid	10	0	4	144	0.833333	0.166667
F1 hybrid	10	0	5	144	1	0.208333
F1 hybrid	20	0	1	144	0.933333	0.180556
F1 hybrid	20	0	2	120	0.733333	0.175
F1 hybrid	20	0	3	120	0.9	0.225
F1 hybrid	20	0	4	120	0.9	0.225
F1 hybrid	20	0	5	120	0.733333	0.175
F1 hybrid	1.25	5	1	336	0.0333333	0.00297619
F1 hybrid	1.25	5	2	360	0.0666667	0.00555556
F1 hybrid	1.25	5	3	336	0.0333333	0.00297619
F1 hybrid	1.25	5	4	288	0.0333333	0.00347222
F1 hybrid	1.25	5	5	360	0.0333333	0.00277778
F1 hybrid	2.5	5	1	300	0.333333	0.0297619
F1 hybrid	2.5	5	2	312	0.266667	0.0222222
F1 hybrid	2.5	5	3	252	0.2	0.0173611
F1 hybrid	2.5	5	4	312	0.2	0.0166667
F1 hybrid	2.5	5	5	228	0.0666667	0.00833333
F1 hybrid	5	5	1	216	0.6	0.0681818
F1 hybrid	5	5	2	204	0.6	0.0694444
F1 hybrid	5	5	3	192	0.6	0.0787037
F1 hybrid	5	5	4	192	0.566667	0.0740741
F1 hybrid	5	5	5	192	0.366667	0.0378788
F1 hybrid	10	5	1	144	0.666667	0.125
F1 hybrid	10	5	2	144	0.8	0.142857
F1 hybrid	10	5	3	144	0.766667	0.136905
F1 hybrid	10	5	4	144	0.833333	0.152778
F1 hybrid	10	5	5	144	0.833333	0.131944
F1 hybrid	20	5	1	120	0.633333	0.133333
F1 hybrid	20	5	2	120	0.6	0.141667
F1 hybrid	20	5	3	120	0.633333	0.141667
F1 hybrid	20	5	4	120	0.8	0.183333
F1 hybrid	20	5	5	120	0.6	0.15
F1 hybrid	1.25	10	1	324	0.0666667	0.00595238
F1 hybrid	1.25	10	2		0	0
F1 hybrid	1.25	10	3	312	0.0333333	0.00320513
F1 hybrid	1.25	10	4	288	0.0333333	0.00347222
F1 hybrid	1.25	10	5		0	0
F1 hybrid	2.5	10	1	288	0.166667	0.0130208
F1 hybrid	2.5	10	2	288	0.3	0.025
F1 hybrid	2.5	10	3	300	0.266667	0.0224359
F1 hybrid	2.5	10	4	288	0.2	0.015625
F1 hybrid	2.5	10	5	312	0.233333	0.0182292
F1 hybrid	5	10	1	216	0.633333	0.075
F1 hybrid	5	10	2	240	0.5	0.0568182
F1 hybrid	5	10	3	240	0.433333	0.0492424
F1 hybrid	5	10	4	240	0.4	0.0458333
F1 hybrid	5	10	5	216	0.666667	0.0757576
F1 hybrid	10	10	1	144	0.833333	0.14881
F1 hybrid	10	10	2	144	0.766667	0.136905
F1 hybrid	10	10	3	168	0.766667	0.136905
F1 hybrid	10	10	4	168	0.7	0.119048
F1 hybrid	10	10	5	168	0.766667	0.136905
F1 hybrid	20	10	1	120	0.733333	0.138889
F1 hybrid	20	10	2	120	0.6	0.141667
F1 hybrid	20	10	3	144	0.533333	0.111111
F1 hybrid	20	10	4	144	0.666667	0.131944
F1 hybrid	20	10	5	144	0.7	0.138889
F1 hybrid	1.25	15	1		0	0
F1 hybrid	1.25	15	2		0	0
F1 hybrid	1.25	15	3		0	0
F1 hybrid	1.25	15	4		0	0
F1 hybrid	1.25	15	5		0	0
F1 hybrid	2.5	15	1	336	0.0666667	0.00555556
F1 hybrid	2.5	15	2	336	0.166667	0.0138889
F1 hybrid	2.5	15	3	360	0.1	0.0078125
F1 hybrid	2.5	15	4	288	0.0333333	0.00347222
F1 hybrid	2.5	15	5	360	0.0666667	0.00520833
F1 hybrid	5	15	1	264	0.533333	0.0555556
F1 hybrid	5	15	2	240	0.566667	0.0590278
F1 hybrid	5	15	3	252	0.533333	0.0555556
F1 hybrid	5	15	4	264	0.8	0.0833333
F1 hybrid	5	15	5	240	0.466667	0.0492424
F1 hybrid	10	15	1	168	0.666667	0.0989583
F1 hybrid	10	15	2	168	0.766667	0.119792
F1 hybrid	10	15	3	168	0.9	0.135417
F1 hybrid	10	15	4	168	0.8	0.125
F1 hybrid	10	15	5	192	0.933333	0.145833
F1 hybrid	20	15	1	144	0.666667	0.131944
F1 hybrid	20	15	2	144	0.8	0.159722
F1 hybrid	20	15	3	144	0.7	0.125
F1 hybrid	20	15	4	144	1	0.208333
F1 hybrid	20	15	5	144	0.833333	0.166667
F1 hybrid	1.25	20	1		0	0
F1 hybrid	1.25	20	2		0	0
F1 hybrid	1.25	20	3		0	0
F1 hybrid	1.25	20	4		0	0
F1 hybrid	1.25	20	5		0	0
F1 hybrid	2.5	20	1	384	0.0333333	0.00260417
F1 hybrid	2.5	20	2		0	0
F1 hybrid	2.5	20	3		0	0
F1 hybrid	2.5	20	4		0	0
F1 hybrid	2.5	20	5		0.0333333	0.00245098
F1 hybrid	5	20	1	288	0.866667	0.077381
F1 hybrid	5	20	2	336	0.733333	0.0611111
F1 hybrid	5	20	3	276	0.6	0.05
F1 hybrid	5	20	4	288	0.8	0.0625
F1 hybrid	5	20	5	264	0.566667	0.0505952
F1 hybrid	10	20	1	216	0.9	0.125
F1 hybrid	10	20	2	216	0.866667	0.108333
F1 hybrid	10	20	3	144	0.766667	0.109375
F1 hybrid	10	20	4	192	0.733333	0.101852
F1 hybrid	10	20	5	192	0.833333	0.115741
F1 hybrid	20	20	1	144	0.566667	0.10119
F1 hybrid	20	20	2	168	0.366667	0.0535714
F1 hybrid	20	20	3	168	0.433333	0.0601852
F1 hybrid	20	20	4	144	0.466667	0.0714286
F1 hybrid	20	20	5	144	0.633333	0.104167
