# Supplementary material for: Natural variation in sugar tolerance associates with changes in signaling and mitochondrial ribosome biogenesis
Source: eLife. 2018 Nov 27;7:e40841. doi: 10.7554/eLife.40841 (PMC6301794; doi:10.7554/eLife.40841)
Supplement: Figure 6—source data 1. [file elife-40841-fig6-data1.xlsx]

## Sheet: Sheet1
Number of pupae
	0	1	2	3	4	5	6	7	8	9	10	11	12	13	14	15	days after egg laying
A ctrl LSD	0	0	0	0	0	0	25	28	28	28	28	28	28	28	28	28
B	0	0	0	0	0	0	26	28	29	29	30	30	30	30	30	30
C	0	0	0	0	0	0	24	27	27	27	27	27	27	27	27	27
D	0	0	0	0	0	0	26	30	30	30	30	30	30	30	30	30
A ctrl HSD	0	0	0	0	0	0	0	26	28	28	28	28	28	28	28	28
B	0	0	0	0	0	0	0	27	27	27	27	27	27	27	27	27
C	0	0	0	0	0	0	0	29	30	30	30	30	30	30	30	30
D	0	0	0	0	0	0	0	26	29	29	29	29	29	29	29	29
A mRPL43 RNAi LSD	0	0	0	0	0	0	0	15	27	27	27	27	27	27	27	27
B	0	0	0	0	0	0	0	4	22	26	26	26	26	26	26	26
C	0	0	0	0	0	0	0	11	24	28	28	28	28	28	28	28
D	0	0	0	0	0	0	0	6	23	24	24	24	24	24	24	24
A mRPL43 RNAi HSD	0	0	0	0	0	0	0	0	1	3	14	17	21	24	24	24
B	0	0	0	0	0	0	0	0	0	5	11	19	22	23	23	23
C	0	0	0	0	0	0	0	0	0	1	14	19	22	23	23	23
D	0	0	0	0	0	0	0	0	0	2	12	20	25	25	25	25
A ctrl LSD	0	0	0	0	0	0	27	27	27	27	27	27	27	27	27	27
B	0	0	0	0	0	0	23	25	25	25	25	25	25	25	25	25
C	0	0	0	0	0	0	25	25	25	25	25	25	25	25	25	25
A ctrl HSD	0	0	0	0	0	0	1	28	28	28	28	28	28	28	28	28
B	0	0	0	0	0	0	1	26	27	27	27	27	27	27	27	27
C	0	0	0	0	0	0	2	26	29	29	29	29	29	29	29	29
A mRPL43 RNAi LSD	0	0	0	0	0	0	0	8	28	29	29	29	29	29	29	29
B	0	0	0	0	0	0	0	5	27	27	27	27	27	27	27	27
C	0	0	0	0	0	0	0	14	25	25	25	25	25	25	25	25
A mRPL43 RNAi HSD	0	0	0	0	0	0	0	0	0	2	12	21	21	21	21	21
B	0	0	0	0	0	0	0	0	0	7	17	26	26	26	26	26
C	0	0	0	0	0	0	0	0	0	6	16	22	22	22	22	22
