# Supplementary material for: Natural variation in sugar tolerance associates with changes in signaling and mitochondrial ribosome biogenesis
Source: eLife. 2018 Nov 27;7:e40841. doi: 10.7554/eLife.40841 (PMC6301794; doi:10.7554/eLife.40841)
Supplement: Figure 6—source data 2. [file elife-40841-fig6-data2.xlsx]

## Sheet: Sheet1
Number of pupae
	0	1	2	3	4	5	6	7	8	9	10	11	12	13	14	15	days after egg laying
A ctrl LSD	0	0	0	0	0	0	27	28	28	28	28	28	28	28	28	28
B	0	0	0	0	0	0	23	29	29	29	29	29	29	29	29	29
C	0	0	0	0	0	0	23	30	30	30	30	30	30	30	30	30
D	0	0	0	0	0	0	22	27	27	27	27	27	27	27	27	27
E	0	0	0	0	0	0	18	28	28	28	28	28	28	28	28	28
A ctrl HSD	0	0	0	0	0	0	0	4	28	28	28	29	29	29	29	29
B	0	0	0	0	0	0	0	12	26	26	26	26	26	26	26	26
C	0	0	0	0	0	0	0	3	28	29	29	29	29	29	29	29
D	0	0	0	0	0	0	0	3	27	27	27	27	27	27	27	27
E	0	0	0	0	0	0	0	9	28	28	28	28	28	28	28	28
A CG4882 RNAi LSD	0	0	0	0	0	0	0	0	0	4	5	7	9	11	12	12
B	0	0	0	0	0	0	0	0	0	0	4	7	11	12	14	14
C	0	0	0	0	0	0	0	0	1	2	6	6	7	12	14	14
D	0	0	0	0	0	0	0	0	0	2	6	6	7	12	12	12
E	0	0	0	0	0	0	0	0	0	0	5	7	8	11	12	12
A CG4882 RNAi HSD	0	0	0	0	0	0	0	0	0	0	0	0	0	0	0	0
B	0	0	0	0	0	0	0	0	0	0	0	0	0	0	0	0
C	0	0	0	0	0	0	0	0	0	0	0	0	0	0	0	0
D	0	0	0	0	0	0	0	0	0	0	0	0	0	0	0	0
E	0	0	0	0	0	0	0	0	0	0	0	0	0	0	0	0
A ctrl LSD	0	0	0	0	0	0	21	29	29	29	29	29	29	29	29	29
B	0	0	0	0	0	0	19	29	29	29	29	29	29	29	29	29
C	0	0	0	0	0	0	12	30	30	30	30	30	30	30	30	30
D	0	0	0	0	0	0	12	29	30	30	30	30	30	30	30	30
E	0	0	0	0	0	0	7	28	28	28	28	28	28	28	28	28
A ctrl HSD	0	0	0	0	0	0	0	4	28	28	28	28	28	28	28	28
B	0	0	0	0	0	0	0	5	27	28	28	28	28	28	28	28
C	0	0	0	0	0	0	0	7	29	29	29	29	29	29	29	29
D	0	0	0	0	0	0	0	20	28	28	28	28	28	28	28	28
E	0	0	0	0	0	0	0	19	24	24	24	24	24	24	24	24
A CG4882 RNAi LSD	0	0	0	0	0	0	0	0	0	0	2	4	6	8	10	11
B	0	0	0	0	0	0	0	0	2	5	9	11	13	14	16	16
C	0	0	0	0	0	0	0	0	0	7	10	10	12	13	13	14
D	0	0	0	0	0	0	0	0	0	0	3	5	9	12	13	13
A CG4882 RNAi HSD	0	0	0	0	0	0	0	0	0	0	0	0	0	0	0	0
B	0	0	0	0	0	0	0	0	0	0	0	0	0	0	0	0
C	0	0	0	0	0	0	0	0	0	0	0	0	0	0	0	0
D	0	0	0	0	0	0	0	0	0	0	0	0	0	0	0	0
