# Supplementary material for: Natural variation in sugar tolerance associates with changes in signaling and mitochondrial ribosome biogenesis
Source: eLife. 2018 Nov 27;7:e40841. doi: 10.7554/eLife.40841 (PMC6301794; doi:10.7554/eLife.40841)
Supplement: Figure 6—source data 3. [file elife-40841-fig6-data3.xlsx]

## Sheet: Sheet1
Number of pupae
	0	1	2	3	4	5	6	7	8	9	10	11	12	13	14	15	days after egg laying
A ctrl LSD	0	0	0	0	0	0	28	30	30	30	30	30	30	30	30	30
B	0	0	0	0	0	0	24	26	26	26	26	26	26	26	26	26
C	0	0	0	0	0	0	26	28	28	28	28	28	28	28	28	28
A ctrl HSD	0	0	0	0	0	0	2	24	26	26	26	26	26	26	26	26
B	0	0	0	0	0	0	4	30	30	30	30	30	30	30	30	30
C	0	0	0	0	0	0	6	26	27	27	27	27	27	27	27	27
A bonsai RNAi LSD	0	0	0	0	0	0	0	1	6	10	10	10	10	10	10	10
B	0	0	0	0	0	0	0	0	4	6	6	6	6	6	6	6
C	0	0	0	0	0	0	0	4	7	10	10	10	10	10	10	10
A bonsai RNAi HSD	0	0	0	0	0	0	0	0	0	0	0	3	3	3	3	3
B	0	0	0	0	0	0	0	0	0	0	0	3	4	4	4	4
C	0	0	0	0	0	0	0	0	0	1	3	7	7	7	7	7
