# Supplementary material for: Natural variation in sugar tolerance associates with changes in signaling and mitochondrial ribosome biogenesis
Source: eLife. 2018 Nov 27;7:e40841. doi: 10.7554/eLife.40841 (PMC6301794; doi:10.7554/eLife.40841)
Supplement: Figure 7—source data 1. [file elife-40841-fig7-data1.xlsx]

## Sheet: Sheet1
Number of pupae
	0	1	2	3	4	5	6	7	8	9	10	11	12	13	14	15	days after egg laying
A ctrl LSD	0	0	0	0	0	0	25	28	28	28	28	28	28	28	28	28
B	0	0	0	0	0	0	26	28	29	29	30	30	30	30	30	30
C	0	0	0	0	0	0	24	27	27	27	27	27	27	27	27	27
D	0	0	0	0	0	0	26	30	30	30	30	30	30	30	30	30
A ctrl HSD	0	0	0	0	0	0	0	26	28	28	28	28	28	28	28	28
B	0	0	0	0	0	0	0	27	27	27	27	27	27	27	27	27
C	0	0	0	0	0	0	0	29	30	30	30	30	30	30	30	30
D	0	0	0	0	0	0	0	26	29	29	29	29	29	29	29	29
A SERCA RNAi LSD	0	0	0	0	0	0	0	4	6	11	14	14	14	14	14	14
B	0	0	0	0	0	0	0	7	8	15	15	17	17	17	17	17
C	0	0	0	0	0	0	0	5	8	11	13	15	15	15	15	15
D	0	0	0	0	0	0	0	3	5	11	13	15	15	15	15	15
A SERCA RNAi HSD	0	0	0	0	0	0	0	0	0	0	2	2	3	3	3	3
B	0	0	0	0	0	0	0	0	0	0	0	0	2	2	2	2
C	0	0	0	0	0	0	0	0	0	0	0	3	3	3	3	3
D	0	0	0	0	0	0	0	0	0	0	0	0	2	2	2	2
A ctrl LSD	0	0	0	0	0	0	27	27	27	27	27	27	27	27	27	27
B	0	0	0	0	0	0	23	25	25	25	25	25	25	25	25	25
C	0	0	0	0	0	0	25	25	25	25	25	25	25	25	25	25
A ctrl HSD	0	0	0	0	0	0	1	28	28	28	28	28	28	28	28	28
B	0	0	0	0	0	0	1	26	27	27	27	27	27	27	27	27
C	0	0	0	0	0	0	2	26	29	29	29	29	29	29	29	29
A SERCA RNAi LSD	0	0	0	0	0	0	3	6	9	11	11	11	11	11	11	11
B	0	0	0	0	0	0	0	6	9	10	10	11	11	11	11	11
C	0	0	0	0	0	0	1	4	4	7	9	9	9	9	9	9
A SERCA RNAi HSD	0	0	0	0	0	0	0	0	0	0	0	1	1	1	1	1
B	0	0	0	0	0	0	0	0	0	0	0	1	1	1	1	1
C	0	0	0	0	0	0	0	1	1	1	1	2	2	2	2	2
