# Supplementary material for: Natural variation in sugar tolerance associates with changes in signaling and mitochondrial ribosome biogenesis
Source: eLife. 2018 Nov 27;7:e40841. doi: 10.7554/eLife.40841 (PMC6301794; doi:10.7554/eLife.40841)
Supplement: Figure 7—source data 2. [file elife-40841-fig7-data2.xlsx]

## Sheet: Sheet1
Number of pupae
	0	1	2	3	4	5	6	7	8	9	10	11	12	13	days after egg laying
A control LSD	0	0	0	0	0	0	24	28	28	28	28	28	28	28
B	0	0	0	0	0	0	24	28	28	28	28	28	28	28
C	0	0	0	0	0	0	15	30	30	30	30	30	30	30
A ctrl HSD	0	0	0	0	0	0	0	25	25	25	26	26	26	26
B	0	0	0	0	0	0	0	26	28	28	28	28	28	28
C	0	0	0	0	0	0	0	24	26	26	26	26	26	26
A PPP1R15 RNAi LSD	0	0	0	0	0	0	0	1	1	4	7	7	7	7
B	0	0	0	0	0	0	0	3	5	6	12	12	12	12
C	0	0	0	0	0	0	0	1	2	2	6	6	6	6
A PPP1R15 RNAi HSD	0	0	0	0	0	0	0	0	0	0	1	1	1	1
B	0	0	0	0	0	0	0	0	0	0	0	0	0	0
C	0	0	0	0	0	0	0	0	0	0	0	0	0	0
A control LSD	0	0	0	0	0	0	23	24	25	25	25	25	25	25
B	0	0	0	0	0	0	22	26	26	26	26	26	26	26
C	0	0	0	0	0	0	20	21	21	22	22	22	22	22
D	0	0	0	0	0	0	24	24	24	24	25	25	25	25
E	0	0	0	0	0	0	17	19	19	19	19	19	19	19
A ctrl HSD	0	0	0	0	0	0	0	24	26	27	27	27	27	27
B	0	0	0	0	0	0	2	22	26	26	26	26	26	26
C	0	0	0	0	0	0	2	21	27	27	27	27	27	27
D	0	0	0	0	0	0	0	20	28	28	28	28	28	28
E	0	0	0	0	0	0	0	19	24	24	24	24	24	24
A PPP1R15 RNAi LSD	0	0	0	0	0	0	0	4	6	7	9	10	10	10
B	0	0	0	0	0	0	0	3	4	7	7	8	8	8
C	0	0	0	0	0	0	0	1	4	5	5	6	6	6
D	0	0	0	0	0	0	0	3	3	5	8	9	9	9
E	0	0	0	0	0	0	0	5	8	12	13	13	13	13
A PPP1R15 RNAi HSD	0	0	0	0	0	0	0	0	0	0	0	0	0	0
B	0	0	0	0	0	0	0	0	0	0	0	0	0	0
C	0	0	0	0	0	0	0	0	0	0	0	0	0	0
D	0	0	0	0	0	0	0	1	1	1	1	1	1	1
E	0	0	0	0	0	0	0	1	3	3	3	3	3	3
A control LSD	0	0	0	0	0	0	16	22	22	22	22	22	22	22
B	0	0	0	0	0	0	12	20	21	22	22	22	22	22
C	0	0	0	0	0	0	19	26	26	26	26	26	26	26
D	0	0	0	0	0	0	20	25	26	26	26	26	26	26
E	0	0	0	0	0	0	15	21	21	21	21	21	21	21
A ctrl HSD	0	0	0	0	0	0	0	24	28	28	28	28	28	28
B	0	0	0	0	0	0	1	18	25	27	27	27	27	27
C	0	0	0	0	0	0	0	22	26	26	26	26	26	26
D	0	0	0	0	0	0	0	19	24	25	25	25	25	25
E	0	0	0	0	0	0	0	25	28	29	29	29	29	29
A PPP1R15 RNAi LSD	0	0	0	0	0	0	0	0	0	4	4	4	5	5
B	0	0	0	0	0	0	0	0	0	1	3	3	3	3
C	0	0	0	0	0	0	0	0	0	0	0	0	0	0
D	0	0	0	0	0	0	0	0	1	3	5	5	5	5
E	0	0	0	0	0	0	0	1	1	5	7	7	7	7
A PPP1R15 RNAi HSD	0	0	0	0	0	0	0	0	2	2	2	2	2	2
B	0	0	0	0	0	0	0	0	0	0	0	0	0	0
C	0	0	0	0	0	0	0	0	1	1	1	1	1	1
D	0	0	0	0	0	0	0	0	0	0	0	0	0	0
E	0	0	0	0	0	0	0	0	1	1	1	1	1	1
