# Supplementary material for: Natural variation in sugar tolerance associates with changes in signaling and mitochondrial ribosome biogenesis
Source: eLife. 2018 Nov 27;7:e40841. doi: 10.7554/eLife.40841 (PMC6301794; doi:10.7554/eLife.40841)
Supplement: Figure 7—source data 3. [file elife-40841-fig7-data3.xlsx]

## Sheet: Sheet1
Number of pupae
	0	1	2	3	4	5	6	7	8	9	10	11	12	13	days after egg laying
A ctrl LSD	0	0	0	0	0	0	11	21	21	21	21	21	21	21
B	0	0	0	0	0	0	13	25	26	26	26	26	26	26
C	0	0	0	0	0	0	10	20	20	20	20	20	20	20
D	0	0	0	0	0	0	24	24	24	24	25	25	25	25
E	0	0	0	0	0	0	17	19	19	19	19	19	19	19
A ctrl HSD	0	0	0	0	0	0	0	1	21	22	22	22	22	22
B	0	0	0	0	0	0	0	3	24	24	24	24	24	24
C	0	0	0	0	0	0	0	7	19	20	20	21	21	21
D	0	0	0	0	0	0	0	20	28	28	28	28	28	28
E	0	0	0	0	0	0	0	19	24	24	24	24	24	24
A Pi3K59F RNAi LSD	0	0	0	0	0	0	10	20	20	21	21	22	22	22
B	0	0	0	0	0	0	15	23	23	24	24	24	24	24
C	0	0	0	0	0	0	11	20	20	20	20	22	22	22
D	0	0	0	0	0	0	7	22	22	23	23	23	23	23
E	0	0	0	0	0	0	11	25	25	26	26	26	26	26
A Pi3K59F RNAi HSD	0	0	0	0	0	0	0	0	0	3	3	10	10	10
B	0	0	0	0	0	0	0	0	1	1	1	2	4	4
C	0	0	0	0	0	0	0	0	2	3	4	9	11	11
D	0	0	0	0	0	0	0	0	1	4	4	7	11	11
E	0	0	0	0	0	0	0	1	5	7	8	12	14	14
