# Supplementary material for: Natural variation in sugar tolerance associates with changes in signaling and mitochondrial ribosome biogenesis
Source: eLife. 2018 Nov 27;7:e40841. doi: 10.7554/eLife.40841 (PMC6301794; doi:10.7554/eLife.40841)
Supplement: Figure 9—source data 1. [file elife-40841-fig9-data1.xlsx]

## Sheet: Sheet1
Genotype	Line	Yeast %	Sucrose %	Replicate	Day (AEL)	% Pupated
BC_Selected	3G5L2A3	2.5	0	1	1	0
BC_Selected	3G5L2A3	2.5	0	1	2	0
BC_Selected	3G5L2A3	2.5	0	1	3	0
BC_Selected	3G5L2A3	2.5	0	1	4	0
BC_Selected	3G5L2A3	2.5	0	1	5	0
BC_Selected	3G5L2A3	2.5	0	1	6	0
BC_Selected	3G5L2A3	2.5	0	1	7	0
BC_Selected	3G5L2A3	2.5	0	1	8	0
BC_Selected	3G5L2A3	2.5	0	1	9	0
BC_Selected	3G5L2A3	2.5	0	1	10	0
BC_Selected	3G5L2A3	2.5	0	1	11	0
BC_Selected	3G5L2A3	2.5	0	1	12	0
BC_Selected	3G5L2A3	2.5	0	1	13	0.033333
BC_Selected	3G5L2A3	2.5	0	1	14	0.066667
BC_Selected	3G5L2A3	2.5	0	1	15	0.2
BC_Selected	3G5L2A3	2.5	0	1	16	0.266667
BC_Selected	3G5L2A3	2.5	0	1	17	0.3
BC_Selected	3G5L2A3	2.5	0	1	18	0.3
BC_Selected	3G5L2A3	2.5	0	1	19	0.3
BC_Selected	3G5L2A3	2.5	0	1	20	0.3
BC_Selected	3G5L2A3	2.5	0	1	21	0.3
BC_Selected	3G5L2A3	2.5	0	1	22	0.3
BC_Selected	3G5L2A3	2.5	0	1	23	0.3
BC_Selected	3G5L2A3	2.5	0	1	24	0.3
BC_Selected	3G5L2A3	2.5	0	1	25	0.3
BC_Selected	3G5L2A3	2.5	0	1	26	0.3
BC_Selected	3G5L2A3	2.5	0	1	27	0.3
BC_Selected	3G5L2A3	2.5	0	1	28
BC_Selected	3G5L2A3	2.5	0	1	29
BC_Selected	3G5L2A3	2.5	0	1	30
BC_Selected	3G5L2A3	2.5	0	2	1	0
BC_Selected	3G5L2A3	2.5	0	2	2	0
BC_Selected	3G5L2A3	2.5	0	2	3	0
BC_Selected	3G5L2A3	2.5	0	2	4	0
BC_Selected	3G5L2A3	2.5	0	2	5	0
BC_Selected	3G5L2A3	2.5	0	2	6	0
BC_Selected	3G5L2A3	2.5	0	2	7	0
BC_Selected	3G5L2A3	2.5	0	2	8	0
BC_Selected	3G5L2A3	2.5	0	2	9	0
BC_Selected	3G5L2A3	2.5	0	2	10	0
BC_Selected	3G5L2A3	2.5	0	2	11	0
BC_Selected	3G5L2A3	2.5	0	2	12	0.033333
BC_Selected	3G5L2A3	2.5	0	2	13	0.133333
BC_Selected	3G5L2A3	2.5	0	2	14	0.233333
BC_Selected	3G5L2A3	2.5	0	2	15	0.333333
BC_Selected	3G5L2A3	2.5	0	2	16	0.366667
BC_Selected	3G5L2A3	2.5	0	2	17	0.366667
BC_Selected	3G5L2A3	2.5	0	2	18	0.366667
BC_Selected	3G5L2A3	2.5	0	2	19	0.4
BC_Selected	3G5L2A3	2.5	0	2	20	0.4
BC_Selected	3G5L2A3	2.5	0	2	21	0.466667
BC_Selected	3G5L2A3	2.5	0	2	22	0.466667
BC_Selected	3G5L2A3	2.5	0	2	23	0.466667
BC_Selected	3G5L2A3	2.5	0	2	24	0.466667
BC_Selected	3G5L2A3	2.5	0	2	25	0.466667
BC_Selected	3G5L2A3	2.5	0	2	26	0.466667
BC_Selected	3G5L2A3	2.5	0	2	27	0.466667
BC_Selected	3G5L2A3	2.5	0	2	28
BC_Selected	3G5L2A3	2.5	0	2	29
BC_Selected	3G5L2A3	2.5	0	2	30
BC_Selected	3G5L2A3	2.5	0	3	1	0
BC_Selected	3G5L2A3	2.5	0	3	2	0
BC_Selected	3G5L2A3	2.5	0	3	3	0
BC_Selected	3G5L2A3	2.5	0	3	4	0
BC_Selected	3G5L2A3	2.5	0	3	5	0
BC_Selected	3G5L2A3	2.5	0	3	6	0
BC_Selected	3G5L2A3	2.5	0	3	7	0
BC_Selected	3G5L2A3	2.5	0	3	8	0
BC_Selected	3G5L2A3	2.5	0	3	9	0
BC_Selected	3G5L2A3	2.5	0	3	10	0
BC_Selected	3G5L2A3	2.5	0	3	11	0
BC_Selected	3G5L2A3	2.5	0	3	12	0
BC_Selected	3G5L2A3	2.5	0	3	13	0.1
BC_Selected	3G5L2A3	2.5	0	3	14	0.166667
BC_Selected	3G5L2A3	2.5	0	3	15	0.266667
BC_Selected	3G5L2A3	2.5	0	3	16	0.266667
BC_Selected	3G5L2A3	2.5	0	3	17	0.4
BC_Selected	3G5L2A3	2.5	0	3	18	0.4
BC_Selected	3G5L2A3	2.5	0	3	19	0.433333
BC_Selected	3G5L2A3	2.5	0	3	20	0.433333
BC_Selected	3G5L2A3	2.5	0	3	21	0.433333
BC_Selected	3G5L2A3	2.5	0	3	22	0.433333
BC_Selected	3G5L2A3	2.5	0	3	23	0.433333
BC_Selected	3G5L2A3	2.5	0	3	24	0.433333
BC_Selected	3G5L2A3	2.5	0	3	25	0.433333
BC_Selected	3G5L2A3	2.5	0	3	26	0.433333
BC_Selected	3G5L2A3	2.5	0	3	27	0.433333
BC_Selected	3G5L2A3	2.5	0	3	28
BC_Selected	3G5L2A3	2.5	0	3	29
BC_Selected	3G5L2A3	2.5	0	3	30
BC_Selected	3G5L2A3	2.5	0	4	1	0
BC_Selected	3G5L2A3	2.5	0	4	2	0
BC_Selected	3G5L2A3	2.5	0	4	3	0
BC_Selected	3G5L2A3	2.5	0	4	4	0
BC_Selected	3G5L2A3	2.5	0	4	5	0
BC_Selected	3G5L2A3	2.5	0	4	6	0
BC_Selected	3G5L2A3	2.5	0	4	7	0
BC_Selected	3G5L2A3	2.5	0	4	8	0
BC_Selected	3G5L2A3	2.5	0	4	9	0
BC_Selected	3G5L2A3	2.5	0	4	10	0
BC_Selected	3G5L2A3	2.5	0	4	11	0
BC_Selected	3G5L2A3	2.5	0	4	12	0
BC_Selected	3G5L2A3	2.5	0	4	13	0.066667
BC_Selected	3G5L2A3	2.5	0	4	14	0.1
BC_Selected	3G5L2A3	2.5	0	4	15	0.233333
BC_Selected	3G5L2A3	2.5	0	4	16	0.3
BC_Selected	3G5L2A3	2.5	0	4	17	0.333333
BC_Selected	3G5L2A3	2.5	0	4	18	0.333333
BC_Selected	3G5L2A3	2.5	0	4	19	0.366667
BC_Selected	3G5L2A3	2.5	0	4	20	0.366667
BC_Selected	3G5L2A3	2.5	0	4	21	0.366667
BC_Selected	3G5L2A3	2.5	0	4	22	0.366667
BC_Selected	3G5L2A3	2.5	0	4	23	0.366667
BC_Selected	3G5L2A3	2.5	0	4	24	0.366667
BC_Selected	3G5L2A3	2.5	0	4	25	0.366667
BC_Selected	3G5L2A3	2.5	0	4	26	0.366667
BC_Selected	3G5L2A3	2.5	0	4	27	0.366667
BC_Selected	3G5L2A3	2.5	0	4	28
BC_Selected	3G5L2A3	2.5	0	4	29
BC_Selected	3G5L2A3	2.5	0	4	30
BC_Selected	3G5L2A3	2.5	0	5	1	0
BC_Selected	3G5L2A3	2.5	0	5	2	0
BC_Selected	3G5L2A3	2.5	0	5	3	0
BC_Selected	3G5L2A3	2.5	0	5	4	0
BC_Selected	3G5L2A3	2.5	0	5	5	0
BC_Selected	3G5L2A3	2.5	0	5	6	0
BC_Selected	3G5L2A3	2.5	0	5	7	0
BC_Selected	3G5L2A3	2.5	0	5	8	0
BC_Selected	3G5L2A3	2.5	0	5	9	0
BC_Selected	3G5L2A3	2.5	0	5	10	0
BC_Selected	3G5L2A3	2.5	0	5	11	0
BC_Selected	3G5L2A3	2.5	0	5	12	0.033333
BC_Selected	3G5L2A3	2.5	0	5	13	0.066667
BC_Selected	3G5L2A3	2.5	0	5	14	0.1
BC_Selected	3G5L2A3	2.5	0	5	15	0.233333
BC_Selected	3G5L2A3	2.5	0	5	16	0.3
BC_Selected	3G5L2A3	2.5	0	5	17	0.333333
BC_Selected	3G5L2A3	2.5	0	5	18	0.333333
BC_Selected	3G5L2A3	2.5	0	5	19	0.333333
BC_Selected	3G5L2A3	2.5	0	5	20	0.333333
BC_Selected	3G5L2A3	2.5	0	5	21	0.333333
BC_Selected	3G5L2A3	2.5	0	5	22	0.333333
BC_Selected	3G5L2A3	2.5	0	5	23	0.333333
BC_Selected	3G5L2A3	2.5	0	5	24	0.333333
BC_Selected	3G5L2A3	2.5	0	5	25	0.333333
BC_Selected	3G5L2A3	2.5	0	5	26	0.333333
BC_Selected	3G5L2A3	2.5	0	5	27	0.333333
BC_Selected	3G5L2A3	2.5	0	5	28
BC_Selected	3G5L2A3	2.5	0	5	29
BC_Selected	3G5L2A3	2.5	0	5	30
BC_Selected	3G5L2A3	2.5	0	6	1	0
BC_Selected	3G5L2A3	2.5	0	6	2	0
BC_Selected	3G5L2A3	2.5	0	6	3	0
BC_Selected	3G5L2A3	2.5	0	6	4	0
BC_Selected	3G5L2A3	2.5	0	6	5	0
BC_Selected	3G5L2A3	2.5	0	6	6	0
BC_Selected	3G5L2A3	2.5	0	6	7	0
BC_Selected	3G5L2A3	2.5	0	6	8	0
BC_Selected	3G5L2A3	2.5	0	6	9	0
BC_Selected	3G5L2A3	2.5	0	6	10	0
BC_Selected	3G5L2A3	2.5	0	6	11	0
BC_Selected	3G5L2A3	2.5	0	6	12	0.033333
BC_Selected	3G5L2A3	2.5	0	6	13	0.033333
BC_Selected	3G5L2A3	2.5	0	6	14	0.033333
BC_Selected	3G5L2A3	2.5	0	6	15	0.033333
BC_Selected	3G5L2A3	2.5	0	6	16	0.033333
BC_Selected	3G5L2A3	2.5	0	6	17
BC_Selected	3G5L2A3	2.5	0	6	18
BC_Selected	3G5L2A3	2.5	0	6	19
BC_Selected	3G5L2A3	2.5	0	7	1	0
BC_Selected	3G5L2A3	2.5	0	7	2	0
BC_Selected	3G5L2A3	2.5	0	7	3	0
BC_Selected	3G5L2A3	2.5	0	7	4	0
BC_Selected	3G5L2A3	2.5	0	7	5	0
BC_Selected	3G5L2A3	2.5	0	7	6	0
BC_Selected	3G5L2A3	2.5	0	7	7	0
BC_Selected	3G5L2A3	2.5	0	7	8	0
BC_Selected	3G5L2A3	2.5	0	7	9	0
BC_Selected	3G5L2A3	2.5	0	7	10	0
BC_Selected	3G5L2A3	2.5	0	7	11	0
BC_Selected	3G5L2A3	2.5	0	7	12	0
BC_Selected	3G5L2A3	2.5	0	7	13	0.1
BC_Selected	3G5L2A3	2.5	0	7	14	0.133333
BC_Selected	3G5L2A3	2.5	0	7	15	0.166667
BC_Selected	3G5L2A3	2.5	0	7	16	0.2
BC_Selected	3G5L2A3	2.5	0	7	17
BC_Selected	3G5L2A3	2.5	0	7	18
BC_Selected	3G5L2A3	2.5	0	7	19
D. simulans	C167.4	2.5	0	1	1	0
D. simulans	C167.4	2.5	0	1	2	0
D. simulans	C167.4	2.5	0	1	3	0
D. simulans	C167.4	2.5	0	1	4	0
D. simulans	C167.4	2.5	0	1	5	0
D. simulans	C167.4	2.5	0	1	6	0
D. simulans	C167.4	2.5	0	1	7	0
D. simulans	C167.4	2.5	0	1	8	0
D. simulans	C167.4	2.5	0	1	9	0
D. simulans	C167.4	2.5	0	1	10	0
D. simulans	C167.4	2.5	0	1	11	0
D. simulans	C167.4	2.5	0	1	12	0
D. simulans	C167.4	2.5	0	1	13	0
D. simulans	C167.4	2.5	0	1	14	0
D. simulans	C167.4	2.5	0	1	15	0.066667
D. simulans	C167.4	2.5	0	1	16	0.133333
D. simulans	C167.4	2.5	0	1	17	0.2
D. simulans	C167.4	2.5	0	1	18	0.233333
D. simulans	C167.4	2.5	0	1	19	0.233333
D. simulans	C167.4	2.5	0	1	20	0.233333
D. simulans	C167.4	2.5	0	1	21	0.233333
D. simulans	C167.4	2.5	0	1	22	0.233333
D. simulans	C167.4	2.5	0	1	23	0.233333
D. simulans	C167.4	2.5	0	1	24	0.233333
D. simulans	C167.4	2.5	0	1	25	0.233333
D. simulans	C167.4	2.5	0	1	26	0.233333
D. simulans	C167.4	2.5	0	1	27
D. simulans	C167.4	2.5	0	1	28
D. simulans	C167.4	2.5	0	1	29
D. simulans	C167.4	2.5	0	2	1	0
D. simulans	C167.4	2.5	0	2	2	0
D. simulans	C167.4	2.5	0	2	3	0
D. simulans	C167.4	2.5	0	2	4	0
D. simulans	C167.4	2.5	0	2	5	0
D. simulans	C167.4	2.5	0	2	6	0
D. simulans	C167.4	2.5	0	2	7	0
D. simulans	C167.4	2.5	0	2	8	0
D. simulans	C167.4	2.5	0	2	9	0
D. simulans	C167.4	2.5	0	2	10	0
D. simulans	C167.4	2.5	0	2	11	0
D. simulans	C167.4	2.5	0	2	12	0
D. simulans	C167.4	2.5	0	2	13	0
D. simulans	C167.4	2.5	0	2	14	0.066667
D. simulans	C167.4	2.5	0	2	15	0.1
D. simulans	C167.4	2.5	0	2	16	0.166667
D. simulans	C167.4	2.5	0	2	17	0.166667
D. simulans	C167.4	2.5	0	2	18	0.166667
D. simulans	C167.4	2.5	0	2	19	0.166667
D. simulans	C167.4	2.5	0	2	20	0.166667
D. simulans	C167.4	2.5	0	2	21	0.166667
D. simulans	C167.4	2.5	0	2	22	0.166667
D. simulans	C167.4	2.5	0	2	23	0.166667
D. simulans	C167.4	2.5	0	2	24	0.166667
D. simulans	C167.4	2.5	0	2	25	0.166667
D. simulans	C167.4	2.5	0	2	26	0.166667
D. simulans	C167.4	2.5	0	2	27
D. simulans	C167.4	2.5	0	2	28
D. simulans	C167.4	2.5	0	2	29
D. simulans	C167.4	2.5	0	3	1	0
D. simulans	C167.4	2.5	0	3	2	0
D. simulans	C167.4	2.5	0	3	3	0
D. simulans	C167.4	2.5	0	3	4	0
D. simulans	C167.4	2.5	0	3	5	0
D. simulans	C167.4	2.5	0	3	6	0
D. simulans	C167.4	2.5	0	3	7	0
D. simulans	C167.4	2.5	0	3	8	0
D. simulans	C167.4	2.5	0	3	9	0
D. simulans	C167.4	2.5	0	3	10	0
D. simulans	C167.4	2.5	0	3	11	0
D. simulans	C167.4	2.5	0	3	12	0.033333
D. simulans	C167.4	2.5	0	3	13	0.066667
D. simulans	C167.4	2.5	0	3	14	0.166667
D. simulans	C167.4	2.5	0	3	15	0.166667
D. simulans	C167.4	2.5	0	3	16	0.2
D. simulans	C167.4	2.5	0	3	17	0.2
D. simulans	C167.4	2.5	0	3	18	0.2
D. simulans	C167.4	2.5	0	3	19	0.2
D. simulans	C167.4	2.5	0	3	20	0.2
D. simulans	C167.4	2.5	0	3	21	0.2
D. simulans	C167.4	2.5	0	3	22	0.2
D. simulans	C167.4	2.5	0	3	23	0.2
D. simulans	C167.4	2.5	0	3	24	0.2
D. simulans	C167.4	2.5	0	3	25	0.2
D. simulans	C167.4	2.5	0	3	26	0.2
D. simulans	C167.4	2.5	0	3	27
D. simulans	C167.4	2.5	0	3	28
D. simulans	C167.4	2.5	0	3	29
D. simulans	C167.4	2.5	0	4	1	0
D. simulans	C167.4	2.5	0	4	2	0
D. simulans	C167.4	2.5	0	4	3	0
D. simulans	C167.4	2.5	0	4	4	0
D. simulans	C167.4	2.5	0	4	5	0
D. simulans	C167.4	2.5	0	4	6	0
D. simulans	C167.4	2.5	0	4	7	0
D. simulans	C167.4	2.5	0	4	8	0
D. simulans	C167.4	2.5	0	4	9	0
D. simulans	C167.4	2.5	0	4	10	0
D. simulans	C167.4	2.5	0	4	11	0.033333
D. simulans	C167.4	2.5	0	4	12	0.033333
D. simulans	C167.4	2.5	0	4	13	0.066667
D. simulans	C167.4	2.5	0	4	14	0.1
D. simulans	C167.4	2.5	0	4	15	0.133333
D. simulans	C167.4	2.5	0	4	16	0.133333
D. simulans	C167.4	2.5	0	4	17	0.166667
D. simulans	C167.4	2.5	0	4	18	0.166667
D. simulans	C167.4	2.5	0	4	19	0.166667
D. simulans	C167.4	2.5	0	4	20	0.166667
D. simulans	C167.4	2.5	0	4	21	0.166667
D. simulans	C167.4	2.5	0	4	22	0.166667
D. simulans	C167.4	2.5	0	4	23	0.166667
D. simulans	C167.4	2.5	0	4	24	0.166667
D. simulans	C167.4	2.5	0	4	25	0.166667
D. simulans	C167.4	2.5	0	4	26	0.166667
D. simulans	C167.4	2.5	0	4	27
D. simulans	C167.4	2.5	0	4	28
D. simulans	C167.4	2.5	0	4	29
D. simulans	C167.4	2.5	0	5	1	0
D. simulans	C167.4	2.5	0	5	2	0
D. simulans	C167.4	2.5	0	5	3	0
D. simulans	C167.4	2.5	0	5	4	0
D. simulans	C167.4	2.5	0	5	5	0
D. simulans	C167.4	2.5	0	5	6	0
D. simulans	C167.4	2.5	0	5	7	0
D. simulans	C167.4	2.5	0	5	8	0
D. simulans	C167.4	2.5	0	5	9	0
D. simulans	C167.4	2.5	0	5	10	0
D. simulans	C167.4	2.5	0	5	11	0.066667
D. simulans	C167.4	2.5	0	5	12	0.066667
D. simulans	C167.4	2.5	0	5	13	0.133333
D. simulans	C167.4	2.5	0	5	14	0.4
D. simulans	C167.4	2.5	0	5	15	0.433333
D. simulans	C167.4	2.5	0	5	16	0.466667
D. simulans	C167.4	2.5	0	5	17	0.5
D. simulans	C167.4	2.5	0	5	18	0.533333
D. simulans	C167.4	2.5	0	5	19	0.533333
D. simulans	C167.4	2.5	0	5	20	0.533333
D. simulans	C167.4	2.5	0	5	21	0.533333
D. simulans	C167.4	2.5	0	5	22	0.533333
D. simulans	C167.4	2.5	0	5	23	0.533333
D. simulans	C167.4	2.5	0	5	24	0.533333
D. simulans	C167.4	2.5	0	5	25	0.533333
D. simulans	C167.4	2.5	0	5	26	0.533333
D. simulans	C167.4	2.5	0	5	27
D. simulans	C167.4	2.5	0	5	28
D. simulans	C167.4	2.5	0	5	29
D. simulans	C167.4	2.5	0	6	1	0
D. simulans	C167.4	2.5	0	6	2	0
D. simulans	C167.4	2.5	0	6	3	0
D. simulans	C167.4	2.5	0	6	4	0
D. simulans	C167.4	2.5	0	6	5	0
D. simulans	C167.4	2.5	0	6	6	0
D. simulans	C167.4	2.5	0	6	7	0
D. simulans	C167.4	2.5	0	6	8	0
D. simulans	C167.4	2.5	0	6	9	0
D. simulans	C167.4	2.5	0	6	10	0
D. simulans	C167.4	2.5	0	6	11	0.033333
D. simulans	C167.4	2.5	0	6	12	0.1
D. simulans	C167.4	2.5	0	6	13	0.1
D. simulans	C167.4	2.5	0	6	14	0.1
D. simulans	C167.4	2.5	0	6	15	0.133333
D. simulans	C167.4	2.5	0	6	16	0.133333
D. simulans	C167.4	2.5	0	6	17
D. simulans	C167.4	2.5	0	6	18
D. simulans	C167.4	2.5	0	6	19
D. simulans	C167.4	2.5	0	7	1	0
D. simulans	C167.4	2.5	0	7	2	0
D. simulans	C167.4	2.5	0	7	3	0
D. simulans	C167.4	2.5	0	7	4	0
D. simulans	C167.4	2.5	0	7	5	0
D. simulans	C167.4	2.5	0	7	6	0
D. simulans	C167.4	2.5	0	7	7	0
D. simulans	C167.4	2.5	0	7	8	0
D. simulans	C167.4	2.5	0	7	9	0
D. simulans	C167.4	2.5	0	7	10	0
D. simulans	C167.4	2.5	0	7	11	0
D. simulans	C167.4	2.5	0	7	12	0.1
D. simulans	C167.4	2.5	0	7	13	0.2
D. simulans	C167.4	2.5	0	7	14	0.233333
D. simulans	C167.4	2.5	0	7	15	0.266667
D. simulans	C167.4	2.5	0	7	16	0.266667
D. simulans	C167.4	2.5	0	7	17
D. simulans	C167.4	2.5	0	7	18
D. simulans	C167.4	2.5	0	7	19
D. simulans	C167.4	2.5	0	8	1	0
D. simulans	C167.4	2.5	0	8	2	0
D. simulans	C167.4	2.5	0	8	3	0
D. simulans	C167.4	2.5	0	8	4	0
D. simulans	C167.4	2.5	0	8	5	0
D. simulans	C167.4	2.5	0	8	6	0
D. simulans	C167.4	2.5	0	8	7	0
D. simulans	C167.4	2.5	0	8	8	0
D. simulans	C167.4	2.5	0	8	9	0
D. simulans	C167.4	2.5	0	8	10	0
D. simulans	C167.4	2.5	0	8	11	0
D. simulans	C167.4	2.5	0	8	12	0.066667
D. simulans	C167.4	2.5	0	8	13	0.133333
D. simulans	C167.4	2.5	0	8	14	0.166667
D. simulans	C167.4	2.5	0	8	15	0.233333
D. simulans	C167.4	2.5	0	8	16	0.266667
D. simulans	C167.4	2.5	0	8	17
D. simulans	C167.4	2.5	0	8	18
D. simulans	C167.4	2.5	0	8	19
D. simulans	C167.4	2.5	0	9	1	0
D. simulans	C167.4	2.5	0	9	2	0
D. simulans	C167.4	2.5	0	9	3	0
D. simulans	C167.4	2.5	0	9	4	0
D. simulans	C167.4	2.5	0	9	5	0
D. simulans	C167.4	2.5	0	9	6	0
D. simulans	C167.4	2.5	0	9	7	0
D. simulans	C167.4	2.5	0	9	8	0
D. simulans	C167.4	2.5	0	9	9	0
D. simulans	C167.4	2.5	0	9	10	0
D. simulans	C167.4	2.5	0	9	11	0
D. simulans	C167.4	2.5	0	9	12	0.066667
D. simulans	C167.4	2.5	0	9	13	0.1
D. simulans	C167.4	2.5	0	9	14	0.133333
D. simulans	C167.4	2.5	0	9	15	0.2
D. simulans	C167.4	2.5	0	9	16	0.2
D. simulans	C167.4	2.5	0	9	17
D. simulans	C167.4	2.5	0	9	18
D. simulans	C167.4	2.5	0	9	19
BC_NoSelection	Ctrl3^8	2.5	0	1	1	0
BC_NoSelection	Ctrl3^8	2.5	0	1	2	0
BC_NoSelection	Ctrl3^8	2.5	0	1	3	0
BC_NoSelection	Ctrl3^8	2.5	0	1	4	0
BC_NoSelection	Ctrl3^8	2.5	0	1	5	0
BC_NoSelection	Ctrl3^8	2.5	0	1	6	0
BC_NoSelection	Ctrl3^8	2.5	0	1	7	0
BC_NoSelection	Ctrl3^8	2.5	0	1	8	0
BC_NoSelection	Ctrl3^8	2.5	0	1	9	0
BC_NoSelection	Ctrl3^8	2.5	0	1	10	0
BC_NoSelection	Ctrl3^8	2.5	0	1	11	0.133333
BC_NoSelection	Ctrl3^8	2.5	0	1	12	0.166667
BC_NoSelection	Ctrl3^8	2.5	0	1	13	0.333333
BC_NoSelection	Ctrl3^8	2.5	0	1	14	0.333333
BC_NoSelection	Ctrl3^8	2.5	0	1	15	0.333333
BC_NoSelection	Ctrl3^8	2.5	0	1	16	0.333333
BC_NoSelection	Ctrl3^8	2.5	0	1	17	0.366667
BC_NoSelection	Ctrl3^8	2.5	0	1	18	0.366667
BC_NoSelection	Ctrl3^8	2.5	0	1	19	0.366667
BC_NoSelection	Ctrl3^8	2.5	0	1	20	0.366667
BC_NoSelection	Ctrl3^8	2.5	0	1	21	0.366667
BC_NoSelection	Ctrl3^8	2.5	0	1	22	0.366667
BC_NoSelection	Ctrl3^8	2.5	0	1	23	0.366667
BC_NoSelection	Ctrl3^8	2.5	0	1	24	0.366667
BC_NoSelection	Ctrl3^8	2.5	0	1	25	0.366667
BC_NoSelection	Ctrl3^8	2.5	0	1	26	0.366667
BC_NoSelection	Ctrl3^8	2.5	0	1	27
BC_NoSelection	Ctrl3^8	2.5	0	1	28
BC_NoSelection	Ctrl3^8	2.5	0	1	29
BC_NoSelection	Ctrl3^8	2.5	0	2	1	0
BC_NoSelection	Ctrl3^8	2.5	0	2	2	0
BC_NoSelection	Ctrl3^8	2.5	0	2	3	0
BC_NoSelection	Ctrl3^8	2.5	0	2	4	0
BC_NoSelection	Ctrl3^8	2.5	0	2	5	0
BC_NoSelection	Ctrl3^8	2.5	0	2	6	0
BC_NoSelection	Ctrl3^8	2.5	0	2	7	0
BC_NoSelection	Ctrl3^8	2.5	0	2	8	0
BC_NoSelection	Ctrl3^8	2.5	0	2	9	0
BC_NoSelection	Ctrl3^8	2.5	0	2	10	0.166667
BC_NoSelection	Ctrl3^8	2.5	0	2	11	0.333333
BC_NoSelection	Ctrl3^8	2.5	0	2	12	0.633333
BC_NoSelection	Ctrl3^8	2.5	0	2	13	0.666667
BC_NoSelection	Ctrl3^8	2.5	0	2	14	0.666667
BC_NoSelection	Ctrl3^8	2.5	0	2	15	0.7
BC_NoSelection	Ctrl3^8	2.5	0	2	16	0.7
BC_NoSelection	Ctrl3^8	2.5	0	2	17	0.7
BC_NoSelection	Ctrl3^8	2.5	0	2	18	0.7
BC_NoSelection	Ctrl3^8	2.5	0	2	19	0.7
BC_NoSelection	Ctrl3^8	2.5	0	2	20	0.7
BC_NoSelection	Ctrl3^8	2.5	0	2	21	0.7
BC_NoSelection	Ctrl3^8	2.5	0	2	22	0.7
BC_NoSelection	Ctrl3^8	2.5	0	2	23	0.7
BC_NoSelection	Ctrl3^8	2.5	0	2	24	0.7
BC_NoSelection	Ctrl3^8	2.5	0	2	25
BC_NoSelection	Ctrl3^8	2.5	0	2	26
BC_NoSelection	Ctrl3^8	2.5	0	2	27
BC_NoSelection	Ctrl3^8	2.5	0	3	1	0
BC_NoSelection	Ctrl3^8	2.5	0	3	2	0
BC_NoSelection	Ctrl3^8	2.5	0	3	3	0
BC_NoSelection	Ctrl3^8	2.5	0	3	4	0
BC_NoSelection	Ctrl3^8	2.5	0	3	5	0
BC_NoSelection	Ctrl3^8	2.5	0	3	6	0
BC_NoSelection	Ctrl3^8	2.5	0	3	7	0
BC_NoSelection	Ctrl3^8	2.5	0	3	8	0
BC_NoSelection	Ctrl3^8	2.5	0	3	9	0
BC_NoSelection	Ctrl3^8	2.5	0	3	10	0
BC_NoSelection	Ctrl3^8	2.5	0	3	11	0
BC_NoSelection	Ctrl3^8	2.5	0	3	12	0.1
BC_NoSelection	Ctrl3^8	2.5	0	3	13	0.1
BC_NoSelection	Ctrl3^8	2.5	0	3	14	0.1
BC_NoSelection	Ctrl3^8	2.5	0	3	15	0.1
BC_NoSelection	Ctrl3^8	2.5	0	3	16	0.1
BC_NoSelection	Ctrl3^8	2.5	0	3	17
BC_NoSelection	Ctrl3^8	2.5	0	3	18
BC_NoSelection	Ctrl3^8	2.5	0	3	19
BC_NoSelection	Ctrl3^8	2.5	0	4	1	0
BC_NoSelection	Ctrl3^8	2.5	0	4	2	0
BC_NoSelection	Ctrl3^8	2.5	0	4	3	0
BC_NoSelection	Ctrl3^8	2.5	0	4	4	0
BC_NoSelection	Ctrl3^8	2.5	0	4	5	0
BC_NoSelection	Ctrl3^8	2.5	0	4	6	0
BC_NoSelection	Ctrl3^8	2.5	0	4	7	0.033333
BC_NoSelection	Ctrl3^8	2.5	0	4	8	0.066667
BC_NoSelection	Ctrl3^8	2.5	0	4	9	0.133333
BC_NoSelection	Ctrl3^8	2.5	0	4	10	0.433333
BC_NoSelection	Ctrl3^8	2.5	0	4	11	0.5
BC_NoSelection	Ctrl3^8	2.5	0	4	12	0.5
BC_NoSelection	Ctrl3^8	2.5	0	4	13	0.633333
BC_NoSelection	Ctrl3^8	2.5	0	4	14	0.633333
BC_NoSelection	Ctrl3^8	2.5	0	4	15
BC_NoSelection	Ctrl3^8	2.5	0	4	16
BC_NoSelection	Ctrl3^8	2.5	0	4	17
BC_NoSelection	Ctrl3^8	2.5	0	5	1	0
BC_NoSelection	Ctrl3^8	2.5	0	5	2	0
BC_NoSelection	Ctrl3^8	2.5	0	5	3	0
BC_NoSelection	Ctrl3^8	2.5	0	5	4	0
BC_NoSelection	Ctrl3^8	2.5	0	5	5	0
BC_NoSelection	Ctrl3^8	2.5	0	5	6	0
BC_NoSelection	Ctrl3^8	2.5	0	5	7	0
BC_NoSelection	Ctrl3^8	2.5	0	5	8	0.033333
BC_NoSelection	Ctrl3^8	2.5	0	5	9	0.066667
BC_NoSelection	Ctrl3^8	2.5	0	5	10	0.2
BC_NoSelection	Ctrl3^8	2.5	0	5	11	0.233333
BC_NoSelection	Ctrl3^8	2.5	0	5	12	0.233333
BC_NoSelection	Ctrl3^8	2.5	0	5	13	0.233333
BC_NoSelection	Ctrl3^8	2.5	0	5	14	0.266667
BC_NoSelection	Ctrl3^8	2.5	0	5	15
BC_NoSelection	Ctrl3^8	2.5	0	5	16
BC_NoSelection	Ctrl3^8	2.5	0	5	17
BC_NoSelection	Ctrl3^8	2.5	0	6	1	0
BC_NoSelection	Ctrl3^8	2.5	0	6	2	0
BC_NoSelection	Ctrl3^8	2.5	0	6	3	0
BC_NoSelection	Ctrl3^8	2.5	0	6	4	0
BC_NoSelection	Ctrl3^8	2.5	0	6	5	0
BC_NoSelection	Ctrl3^8	2.5	0	6	6	0
BC_NoSelection	Ctrl3^8	2.5	0	6	7	0
BC_NoSelection	Ctrl3^8	2.5	0	6	8	0
BC_NoSelection	Ctrl3^8	2.5	0	6	9	0.033333
BC_NoSelection	Ctrl3^8	2.5	0	6	10	0.166667
BC_NoSelection	Ctrl3^8	2.5	0	6	11	0.266667
BC_NoSelection	Ctrl3^8	2.5	0	6	12	0.4
BC_NoSelection	Ctrl3^8	2.5	0	6	13	0.4
BC_NoSelection	Ctrl3^8	2.5	0	6	14	0.4
BC_NoSelection	Ctrl3^8	2.5	0	6	15
BC_NoSelection	Ctrl3^8	2.5	0	6	16
BC_NoSelection	Ctrl3^8	2.5	0	6	17
BC_NoSelection	Ctrl3^8	2.5	0	7	1	0
BC_NoSelection	Ctrl3^8	2.5	0	7	2	0
BC_NoSelection	Ctrl3^8	2.5	0	7	3	0
BC_NoSelection	Ctrl3^8	2.5	0	7	4	0
BC_NoSelection	Ctrl3^8	2.5	0	7	5	0
BC_NoSelection	Ctrl3^8	2.5	0	7	6	0
BC_NoSelection	Ctrl3^8	2.5	0	7	7	0
BC_NoSelection	Ctrl3^8	2.5	0	7	8	0
BC_NoSelection	Ctrl3^8	2.5	0	7	9	0
BC_NoSelection	Ctrl3^8	2.5	0	7	10	0.166667
BC_NoSelection	Ctrl3^8	2.5	0	7	11	0.366667
BC_NoSelection	Ctrl3^8	2.5	0	7	12	0.466667
BC_NoSelection	Ctrl3^8	2.5	0	7	13	0.5
BC_NoSelection	Ctrl3^8	2.5	0	7	14	0.5
BC_NoSelection	Ctrl3^8	2.5	0	7	15
BC_NoSelection	Ctrl3^8	2.5	0	7	16
BC_NoSelection	Ctrl3^8	2.5	0	7	17
BC_NoSelection	Ctrl3^8	2.5	0	8	1	0
BC_NoSelection	Ctrl3^8	2.5	0	8	2	0
BC_NoSelection	Ctrl3^8	2.5	0	8	3	0
BC_NoSelection	Ctrl3^8	2.5	0	8	4	0
BC_NoSelection	Ctrl3^8	2.5	0	8	5	0
BC_NoSelection	Ctrl3^8	2.5	0	8	6	0
BC_NoSelection	Ctrl3^8	2.5	0	8	7	0
BC_NoSelection	Ctrl3^8	2.5	0	8	8	0
BC_NoSelection	Ctrl3^8	2.5	0	8	9	0
BC_NoSelection	Ctrl3^8	2.5	0	8	10	0.133333
BC_NoSelection	Ctrl3^8	2.5	0	8	11	0.4
BC_NoSelection	Ctrl3^8	2.5	0	8	12	0.433333
BC_NoSelection	Ctrl3^8	2.5	0	8	13	0.466667
BC_NoSelection	Ctrl3^8	2.5	0	8	14	0.466667
BC_NoSelection	Ctrl3^8	2.5	0	8	15
BC_NoSelection	Ctrl3^8	2.5	0	8	16
BC_NoSelection	Ctrl3^8	2.5	0	8	17
D. sechellia	SynA	2.5	0	1	1	0
D. sechellia	SynA	2.5	0	1	2	0
D. sechellia	SynA	2.5	0	1	3	0
D. sechellia	SynA	2.5	0	1	4	0
D. sechellia	SynA	2.5	0	1	5	0
D. sechellia	SynA	2.5	0	1	6	0
D. sechellia	SynA	2.5	0	1	7	0
D. sechellia	SynA	2.5	0	1	8	0.0333333
D. sechellia	SynA	2.5	0	1	9	0.0333333
D. sechellia	SynA	2.5	0	1	10	0.0333333
D. sechellia	SynA	2.5	0	1	11	0.3
D. sechellia	SynA	2.5	0	1	12	0.366667
D. sechellia	SynA	2.5	0	1	13	0.366667
D. sechellia	SynA	2.5	0	1	14	0.366667
D. sechellia	SynA	2.5	0	1	15	0.366667
D. sechellia	SynA	2.5	0	1	16	0.366667
D. sechellia	SynA	2.5	0	1	17	0.366667
D. sechellia	SynA	2.5	0	2	1	0
D. sechellia	SynA	2.5	0	2	2	0
D. sechellia	SynA	2.5	0	2	3	0
D. sechellia	SynA	2.5	0	2	4	0
D. sechellia	SynA	2.5	0	2	5	0
D. sechellia	SynA	2.5	0	2	6	0
D. sechellia	SynA	2.5	0	2	7	0
D. sechellia	SynA	2.5	0	2	8	0.0666667
D. sechellia	SynA	2.5	0	2	9	0.0666667
D. sechellia	SynA	2.5	0	2	10	0.0666667
D. sechellia	SynA	2.5	0	2	11	0.4
D. sechellia	SynA	2.5	0	2	12	0.433333
D. sechellia	SynA	2.5	0	2	13	0.466667
D. sechellia	SynA	2.5	0	2	14	0.5
D. sechellia	SynA	2.5	0	2	15	0.566667
D. sechellia	SynA	2.5	0	2	16	0.566667
D. sechellia	SynA	2.5	0	2	17	0.566667
D. sechellia	SynA	2.5	0	3	1	0
D. sechellia	SynA	2.5	0	3	2	0
D. sechellia	SynA	2.5	0	3	3	0
D. sechellia	SynA	2.5	0	3	4	0
D. sechellia	SynA	2.5	0	3	5	0
D. sechellia	SynA	2.5	0	3	6	0
D. sechellia	SynA	2.5	0	3	7	0
D. sechellia	SynA	2.5	0	3	8	0
D. sechellia	SynA	2.5	0	3	9	0
D. sechellia	SynA	2.5	0	3	10	0
D. sechellia	SynA	2.5	0	3	11	0.3
D. sechellia	SynA	2.5	0	3	12	0.433333
D. sechellia	SynA	2.5	0	3	13	0.433333
D. sechellia	SynA	2.5	0	3	14	0.466667
D. sechellia	SynA	2.5	0	3	15	0.466667
D. sechellia	SynA	2.5	0	3	16	0.466667
D. sechellia	SynA	2.5	0	3	17	0.466667
D. sechellia	SynA	2.5	0	4	1	0
D. sechellia	SynA	2.5	0	4	2	0
D. sechellia	SynA	2.5	0	4	3	0
D. sechellia	SynA	2.5	0	4	4	0
D. sechellia	SynA	2.5	0	4	5	0
D. sechellia	SynA	2.5	0	4	6	0
D. sechellia	SynA	2.5	0	4	7	0
D. sechellia	SynA	2.5	0	4	8	0
D. sechellia	SynA	2.5	0	4	9	0
D. sechellia	SynA	2.5	0	4	10	0.3
D. sechellia	SynA	2.5	0	4	11	0.433333
D. sechellia	SynA	2.5	0	4	12	0.466667
D. sechellia	SynA	2.5	0	4	13	0.5
D. sechellia	SynA	2.5	0	4	14	0.5
D. sechellia	SynA	2.5	0	4	15	0.5
D. sechellia	SynA	2.5	0	4	16	0.5
D. sechellia	SynA	2.5	0	4	17	0.5
D. sechellia	SynA	2.5	0	5	1	0
D. sechellia	SynA	2.5	0	5	2	0
D. sechellia	SynA	2.5	0	5	3	0
D. sechellia	SynA	2.5	0	5	4	0
D. sechellia	SynA	2.5	0	5	5	0
D. sechellia	SynA	2.5	0	5	6	0
D. sechellia	SynA	2.5	0	5	7	0
D. sechellia	SynA	2.5	0	5	8	0
D. sechellia	SynA	2.5	0	5	9	0
D. sechellia	SynA	2.5	0	5	10	0.233333
D. sechellia	SynA	2.5	0	5	11	0.233333
D. sechellia	SynA	2.5	0	5	12	0.366667
D. sechellia	SynA	2.5	0	5	13	0.4
D. sechellia	SynA	2.5	0	5	14	0.433333
D. sechellia	SynA	2.5	0	5	15	0.433333
D. sechellia	SynA	2.5	0	5	16	0.433333
D. sechellia	SynA	2.5	0	5	17	0.5
