# Supplementary material for: Natural variation in sugar tolerance associates with changes in signaling and mitochondrial ribosome biogenesis
Source: eLife. 2018 Nov 27;7:e40841. doi: 10.7554/eLife.40841 (PMC6301794; doi:10.7554/eLife.40841)
Supplement: Figure 9—source data 2. [file elife-40841-fig9-data2.xlsx]

## Sheet: Sheet1
Number of pupae
	0	1	2	3	4	5	6	7	8	9	10	11	12	13	14	15	16	17	days after egg laying
A control 2% y	0	0	0	0	0	0	0	0	0	0	4	8	13	13	13	14	14	14
B	0	0	0	0	0	0	0	0	0	0	3	10	10	10	10	10	10	10
C	0	0	0	0	0	0	0	0	0	1	7	16	17	19	19	19	19	19
E	0	0	0	0	0	0	0	0	0	1	3	6	7	7	7	7	7	7
A PPP1R15 RNAi 2 % y	0	0	0	0	0	0	0	0	0	0	5	16	22	25	25	25	25	25
B	0	0	0	0	0	0	0	0	0	0	1	8	12	12	13	13	13	13
C	0	0	0	0	0	0	0	0	0	0	2	18	23	25	25	25	25	25
D	0	0	0	0	0	0	0	0	0	0	5	10	15	16	16	17	17	17
E	0	0	0	0	0	0	0	0	0	0	6	17	21	23	23	23	23	23
A control 2% y	0	0	0	0	0	0	0	0	0	1	2	2	2	2	2	2	2	2
B	0	0	0	0	0	0	0	0	0	2	8	12	20	20	20	20	20	20
C	0	0	0	0	0	0	0	0	0	1	3	5	6	7	7	8	8	8
D	0	0	0	0	0	0	0	0	0	0	1	2	2	2	2	2	2	2
A PPP1R15 RNAi 2 % y	0	0	0	0	0	0	0	0	0	1	5	9	10	11	11	11	11	11
B	0	0	0	0	0	0	0	0	0	0	4	8	12	12	14	14	14	14
C	0	0	0	0	0	0	0	0	0	0	6	11	15	17	17	17	17	17
D	0	0	0	0	0	0	0	0	0	1	8	11	15	16	19	19	19	19
A control 2% y	0	0	0	0	0	0	0	0	0	0	0	1	1	1	1	1	1	1
B	0	0	0	0	0	0	0	0	0	0	1	2	3	3	3	3	3	3
C	0	0	0	0	0	0	0	0	0	0	1	1	2	2	2	2	2	2
D	0	0	0	0	0	0	0	0	0	1	3	4	5	5	5	5	5	5
E	0	0	0	0	0	0	0	0	0	0	1	1	1	1	1	1	1	1
A PPP1R15 RNAi 2 % y	0	0	0	0	0	0	0	0	1	6	11	12	12	12	12	12	12	12
B	0	0	0	0	0	0	0	0	0	7	10	11	11	11	11	11	11	11
C	0	0	0	0	0	0	0	0	0	3	9	11	14	14	14	14	14	14
D	0	0	0	0	0	0	0	0	0	3	9	11	13	13	14	14	14	14
E	0	0	0	0	0	0	0	0	0	3	6	9	10	11	12	12	12	12
A control 2% y	0	0	0	0	0	0	0	0	0	5	10	11	12	12	13	14	14	14
B	0	0	0	0	0	0	0	0	0	3	3	3	3	3	3	4	4	4
C	0	0	0	0	0	0	0	0	0	3	3	4	4	4	5	5	5	5
D	0	0	0	0	0	0	0	0	0	1	2	3	3	3	3	3	3	3
E	0	0	0	0	0	0	0	0	0	4	8	10	10	10	10	10	10	10
A PPP1R15 RNAi 2 % y	0	0	0	0	0	0	0	0	0	0	6	13	19	23	24	24	24	24
B	0	0	0	0	0	0	0	0	0	0	2	11	19	21	21	22	22	22
C	0	0	0	0	0	0	0	0	0	0	1	6	15	17	18	18	18	18
D	0	0	0	0	0	0	0	0	0	0	1	5	5	7	7	7	7	7
E	0	0	0	0	0	0	0	0	0	0	2	4	9	9	11	11	12	12
A control 2% y	0	0	0	0	0	0	0	0	0	0	0	0	0	0	0	0	0	0
B	0	0	0	0	0	0	0	0	0	0	0	0	0	0	1	1	1	1
C	0	0	0	0	0	0	0	0	0	0	0	0	0	0	0	0	0	0
D	0	0	0	0	0	0	0	0	0	0	0	0	2	2	2	2	2	2
E	0	0	0	0	0	0	0	0	0	0	0	0	0	0	0	0	0	0
A PPP1R15 RNAi 2 % y	0	0	0	0	0	0	0	0	0	0	1	1	2	3	3	4	4	5
B	0	0	0	0	0	0	0	0	0	0	0	1	1	2	4	6	7	7
C	0	0	0	0	0	0	0	0	0	0	0	0	1	5	5	6	7	8
D	0	0	0	0	0	0	0	0	0	0	0	1	1	3	4	4	4	4
E	0	0	0	0	0	0	0	0	0	0	0	2	2	3	3	3	3	3
A ctrl 2% y	0	0	0	0	0	0	0	0	0	0	0	0	0	0	0	0	0	0
B	0	0	0	0	0	0	0	0	0	0	1	1	2	2	2	2	2	2
C	0	0	0	0	0	0	0	0	0	0	0	0	0	0	0	1	1	1
D	0	0	0	0	0	0	0	0	0	0	0	1	1	1	2	2	2	2
E	0	0	0	0	0	0	0	0	0	1	1	4	5	5	5	5	5	5
A PPP1R15 RNAi 2% y	0	0	0	0	0	0	0	0	0	0	1	1	2	3	3	3	3	3
B	0	0	0	0	0	0	0	0	0	0	0	0	0	0	0	0	0	0
C	0	0	0	0	0	0	0	0	0	0	2	4	6	6	6	6	6	6
D	0	0	0	0	0	0	0	0	0	0	0	1	3	4	4	4	4	4
E	0	0	0	0	0	0	0	0	0	0	0	0	1	1	1	1	1	1
