# Supplementary material for: Natural variation in sugar tolerance associates with changes in signaling and mitochondrial ribosome biogenesis
Source: eLife. 2018 Nov 27;7:e40841. doi: 10.7554/eLife.40841 (PMC6301794; doi:10.7554/eLife.40841)
Supplement: Supplementary file 1. — Genes which were up- or downregulated in both sugar intolerant genotypes when compared to both sugar tolerant genotypes are indicated as well as the genes that were screened by RNAi. [file elife-40841-supp1.xlsx]

## Sheet: intogressed_genelist_full_vh.tx
Table S1
symbol	flybase	fullname	down in intoler.	up in intoler.	Screened	Sugar intolerant
Act42A	FBgn0000043	Actin 42A	NO	NO	NO
Adf1	FBgn0000054	Adh transcription factor 1	NO	NO	YES	NO
Adk2	FBgn0283494	Adenylate kinase 2	NO	NO	YES	lethal
AIMP3	FBgn0050185	aaRS-interacting multifunctional protein 3	NO	NO	NO
Alas	FBgn0020764	Aminolevulinate synthase	NO	NO	YES	NO
Alp2	FBgn0283480	Alkaline phosphatase 2	NO	NO	NO
apt	FBgn0015903	apontic	NO	NO	YES	NO
ari-2	FBgn0025186	ariadne 2	NO	NO	NO
Ars2	FBgn0033062	CG7843 gene product from transcript CG7843-RE	NO	NO	NO
Art7	FBgn0034817	Arginine methyltransferase 7	NO	YES	NO
asrij	FBgn0034793	CG13533 gene product from transcript CG13533-RA	NO	NO	NO
babos	FBgn0034724	CG3624 gene product from transcript CG3624-RB	NO	NO	NO
Bap170	FBgn0042085	Brahma associated protein 170kD	NO	NO	NO
bgcn	FBgn0004581	benign gonial cell neoplasm	NO	NO	YES	NO
blw	FBgn0011211	bellwether	NO	NO	YES	lethal
bonsai	FBgn0026261	CG4207 gene product from transcript CG4207-RA	YES	NO	YES	YES
BubR1	FBgn0263855	Bub1-related kinase	NO	NO	NO
bw	FBgn0000241	brown	NO	NO	NO
CCHa2-R	FBgn0033058	CCHamide-2 receptor	NO	NO	YES	NO
Cdk9	FBgn0019949	Cyclin-dependent kinase 9	NO	NO	NO
CG10332	FBgn0260455	CG10332 gene product from transcript CG10332-RA	NO	NO	NO
CG10344	FBgn0034729	CG10344 gene product from transcript CG10344-RA	NO	NO	NO
CG10384	FBgn0034731	CG10384 gene product from transcript CG10384-RE	NO	NO	NO
CG10904	FBgn0034945	CG10904 gene product from transcript CG10904-RB	NO	NO	NO
CG11073	FBgn0034693	CG11073 gene product from transcript CG11073-RD	NO	NO	NO
CG11269	FBgn0034700	CG11269 gene product from transcript CG11269-RA	NO	NO	NO
CG11291	FBgn0034713	CG11291 gene product from transcript CG11291-RA	NO	NO	NO
CG11298	FBgn0034721	CG11298 gene product from transcript CG11298-RA	NO	NO	NO
CG11474	FBgn0034688	CG11474 gene product from transcript CG11474-RC	YES	NO	YES	NO
CG11475	FBgn0034687	CG11475 gene product from transcript CG11475-RA	NO	NO	YES	NO
CG12490	FBgn0034782	CG12490 gene product from transcript CG12490-RB	NO	NO	NO
CG12782	FBgn0034838	CG12782 gene product from transcript CG12782-RA	NO	NO	NO
CG13488	FBgn0034670	CG13488 gene product from transcript CG13488-RC	NO	NO	NO
CG13500	FBgn0034683	CG13500 gene product from transcript CG13500-RA	NO	NO	NO
CG13501	FBgn0034684	CG13501 gene product from transcript CG13501-RB	NO	NO	NO
CG13502	FBgn0034692	CG13502 gene product from transcript CG13502-RD	NO	NO	NO
CG13506	FBgn0034723	CG13506 gene product from transcript CG13506-RB	NO	NO	NO
CG13510	FBgn0034758	CG13510 gene product from transcript CG13510-RC	NO	NO	YES	NO
CG13511	FBgn0034759	CG13511 gene product from transcript CG13511-RB	NO	NO	NO
CG13516	FBgn0040658	CG13516 gene product from transcript CG13516-RB	NO	NO	NO
CG13526	FBgn0034774	CG13526 gene product from transcript CG13526-RA	NO	NO	NO
CG13527	FBgn0034776	CG13527 gene product from transcript CG13527-RB	NO	NO	NO
CG13531	FBgn0034786	CG13531 gene product from transcript CG13531-RC	NO	NO	NO
CG13532	FBgn0034788	CG13532 gene product from transcript CG13532-RA	NO	NO	NO
CG13539	FBgn0034833	CG13539 gene product from transcript CG13539-RB	NO	NO	NO
CG13540	FBgn0034839	CG13540 gene product from transcript CG13540-RB	NO	NO	NO
CG13541	FBgn0034841	CG13541 gene product from transcript CG13541-RB	NO	NO	NO
CG13544	FBgn0034826	CG13544 gene product from transcript CG13544-RA	NO	NO	NO
CG13551	FBgn0040660	CG13551 gene product from transcript CG13551-RA	YES	NO	YES	NO
CG13557	FBgn0034867	CG13557 gene product from transcript CG13557-RA	NO	NO	NO
CG13558	FBgn0034869	CG13558 gene product from transcript CG13558-RA	NO	NO	NO
CG13561	FBgn0034906	CG13561 gene product from transcript CG13561-RB	NO	NO	NO
CG13562	FBgn0034928	CG13562 gene product from transcript CG13562-RA	NO	NO	NO
CG13563	FBgn0034966	CG13563 gene product from transcript CG13563-RB	NO	NO	NO
CG14591	FBgn0033054	CG14591 gene product from transcript CG14591-RD	NO	NO	YES	NO
CG15233	FBgn0033076	CG15233 gene product from transcript CG15233-RB	NO	NO	NO
CG15237	FBgn0033104	CG15237 gene product from transcript CG15237-RA	YES	NO	YES	NO
CG15800	FBgn0034904	CG15800 gene product from transcript CG15800-RA	NO	NO	NO
CG15908	FBgn0033085	CG15908 gene product from transcript CG15908-RA	YES	NO	NO
CG16787	FBgn0034940	CG16787 gene product from transcript CG16787-RA	YES	NO	NO
CG17266	FBgn0033089	CG17266 gene product from transcript CG17266-RA	NO	NO	YES	NO
CG17658	FBgn0034924	CG17658 gene product from transcript CG17658-RA	NO	NO	NO
CG17807	FBgn0034748	CG17807 gene product from transcript CG17807-RA	NO	NO	NO
CG18223	FBgn0036832	CG18223 gene product from transcript CG18223-RA	NO	NO	NO
CG2852	FBgn0034753	CG2852 gene product from transcript CG2852-RD	NO	NO	NO
CG2921	FBgn0034689	CG2921 gene product from transcript CG2921-RA	YES	NO	NO
CG2970	FBgn0034936	CG2970 gene product from transcript CG2970-RA	NO	NO	NO
CG30172	FBgn0050172	CG30172 gene product from transcript CG30172-RB	NO	NO	NO
CG30177	FBgn0050177	CG30177 gene product from transcript CG30177-RA	NO	NO	YES	NO
CG30183	FBgn0050183	CG30183 gene product from transcript CG30183-RC	NO	NO	NO
CG30184	FBgn0050184	CG30184 gene product from transcript CG30184-RA	NO	NO	NO
CG30187	FBgn0050187	CG30187 gene product from transcript CG30187-RC	NO	NO	NO
CG30192	FBgn0050192	CG30192 gene product from transcript CG30192-RA	NO	NO	NO
CG30195	FBgn0050195	CG30195 gene product from transcript CG30195-RA	NO	NO	NO
CG30196	FBgn0050196	CG30196 gene product from transcript CG30196-RA	NO	NO	NO
CG30259	FBgn0050259	CG30259 gene product from transcript CG30259-RA	NO	NO	NO
CG30265	FBgn0050265	CG30265 gene product from transcript CG30265-RA	NO	NO	YES	NO
CG30268	FBgn0050268	CG30268 gene product from transcript CG30268-RB	NO	NO	NO
CG30269	FBgn0050269	CG30269 gene product from transcript CG30269-RB	NO	NO	NO
CG30270	FBgn0061435	CG30270 gene product from transcript CG30270-RC	NO	NO	NO
CG30271	FBgn0050271	CG30271 gene product from transcript CG30271-RI	NO	NO	NO
CG30273	FBgn0050273	CG30273 gene product from transcript CG30273-RB	NO	NO	NO
CG30274	FBgn0050274	CG30274 gene product from transcript CG30274-RA	NO	NO	NO
CG30275	FBgn0050275	CG30275 gene product from transcript CG30275-RM	NO	NO	NO
CG30280	FBgn0050280	CG30280 gene product from transcript CG30280-RB	NO	NO	NO
CG30281	FBgn0050281	CG30281 gene product from transcript CG30281-RA	NO	NO	NO
CG30411	FBgn0050411	CG30411 gene product from transcript CG30411-RA	NO	YES	NO
CG30412	FBgn0050412	CG30412 gene product from transcript CG30412-RA	NO	NO	NO
CG30413	FBgn0050413	CG30413 gene product from transcript CG30413-RA	NO	NO	NO
CG30414	FBgn0050414	CG30414 gene product from transcript CG30414-RB	NO	NO	NO
CG30416	FBgn0050416	CG30416 gene product from transcript CG30416-RB	NO	NO	NO
CG3065	FBgn0034946	CG3065 gene product from transcript CG3065-RA	NO	NO	NO
CG3085	FBgn0034816	CG3085 gene product from transcript CG3085-RB	NO	NO	NO
CG3092	FBgn0034835	CG3092 gene product from transcript CG3092-RA	NO	NO	NO
CG3121	FBgn0034957	CG3121 gene product from transcript CG3121-RA	NO	NO	NO
CG3124	FBgn0034840	CG3124 gene product from transcript CG3124-RA	NO	NO	NO
CG3209	FBgn0034971	CG3209 gene product from transcript CG3209-RE	NO	YES	YES	NO
CG3215	FBgn0034825	CG3215 gene product from transcript CG3215-RA	NO	NO	YES	NO
CG3264	FBgn0034712	CG3264 gene product from transcript CG3264-RB	YES	NO	NO
CG3267	FBgn0042083	CG3267 gene product from transcript CG3267-RA	NO	NO	NO
CG3270	FBgn0033093	CG3270 gene product from transcript CG3270-RA	NO	YES	YES	NO
CG3292	FBgn0034710	CG3292 gene product from transcript CG3292-RA	NO	NO	NO
CG33143	FBgn0053143	CG33143 gene product from transcript CG33143-RC	NO	NO	NO
CG33919	FBgn0053919	CG33919 gene product from transcript CG33919-RA	NO	NO	NO
CG34029	FBgn0054029	CG34029 gene product from transcript CG34029-RA	NO	NO	NO
CG3409	FBgn0033095	CG3409 gene product from transcript CG3409-RB	NO	NO	NO
CG3420	FBgn0033100	CG3420 gene product from transcript CG3420-RA	YES	NO	YES	lethal
CG34200	FBgn0085229	CG34200 gene product from transcript CG34200-RA	NO	NO	NO
CG34205	FBgn0085234	CG34205 gene product from transcript CG34205-RA	NO	NO	NO
CG34210	FBgn0085239	CG34210 gene product from transcript CG34210-RA	NO	NO	NO
CG34370	FBgn0085399	CG34370 gene product from transcript CG34370-RG	NO	NO	NO
CG34371	FBgn0085400	CG34371 gene product from transcript CG34371-RA	NO	NO	NO
CG34424	FBgn0085453	CG34424 gene product from transcript CG34424-RA	NO	NO	NO
CG3499	FBgn0034792	CG3499 gene product from transcript CG3499-RD	NO	NO	NO
CG3500	FBgn0034849	CG3500 gene product from transcript CG3500-RA	NO	NO	YES	NO
CG3502	FBgn0046253	CG3502 gene product from transcript CG3502-RB	NO	NO	NO
CG3520	FBgn0034859	CG3520 gene product from transcript CG3520-RA	NO	NO	NO
CG3530	FBgn0028497	CG3530 gene product from transcript CG3530-RB	NO	NO	NO
CG3649	FBgn0034785	CG3649 gene product from transcript CG3649-RB	NO	NO	NO
CG3700	FBgn0034796	CG3700 gene product from transcript CG3700-RA	NO	NO	NO
CG3732	FBgn0034750	CG3732 gene product from transcript CG3732-RA	NO	NO	NO
CG3735	FBgn0034933	CG3735 gene product from transcript CG3735-RB	NO	NO	NO
CG3746	FBgn0034755	CG3746 gene product from transcript CG3746-RB	NO	NO	NO
CG3788	FBgn0034800	CG3788 gene product from transcript CG3788-RB	NO	NO	NO
CG3803	FBgn0034938	CG3803 gene product from transcript CG3803-RA	YES	NO	NO
CG3831	FBgn0034804	CG3831 gene product from transcript CG3831-RC	NO	NO	YES	lethal
CG3860	FBgn0034951	CG3860 gene product from transcript CG3860-RA	NO	NO	NO
CG3906	FBgn0034871	CG3906 gene product from transcript CG3906-RA	NO	NO	NO
CG3927	FBgn0034739	CG3927 gene product from transcript CG3927-RA	NO	NO	NO
CG4021	FBgn0034659	CG4021 gene product from transcript CG4021-RA	NO	NO	NO
CG42260	FBgn0259145	CG42260 gene product from transcript CG42260-RB	NO	NO	NO
CG42284	FBgn0259179	CG42284 gene product from transcript CG42284-RD	NO	NO	NO
CG4250	FBgn0034761	CG4250 gene product from transcript CG4250-RB	YES	NO	YES	NO
CG42559	FBgn0260761	CG42559 gene product from transcript CG42559-RA	NO	NO	NO
CG42565	FBgn0260767	CG42565 gene product from transcript CG42565-RB	NO	NO	YES	lethal
CG42566	FBgn0260768	CG42566 gene product from transcript CG42566-RB	YES	NO	YES	NO
CG4269	FBgn0034741	CG4269 gene product from transcript CG4269-RB	NO	NO	NO
CG42703	FBgn0261614	CG42703 gene product from transcript CG42703-RA	NO	NO	NO
CG42741	FBgn0261705	CG42741 gene product from transcript CG42741-RA	NO	NO	NO
CG4294	FBgn0034742	CG4294 gene product from transcript CG4294-RB	NO	NO	NO
CG4324	FBgn0034956	CG4324 gene product from transcript CG4324-RC	NO	NO	YES	NO
CG43325	FBgn0263030	CG43325 gene product from transcript CG43325-RA	NO	NO	NO
CG44142	FBgn0264991	CG44142 gene product from transcript CG44142-RA	NO	NO	NO
CG44252	FBgn0265187	CG44252 gene product from transcript CG44252-RE	NO	YES	NO
CG4554	FBgn0034734	CG4554 gene product from transcript CG4554-RA	NO	NO	NO
CG4585	FBgn0025335	CG4585 gene product from transcript CG4585-RA	NO	NO	NO
CG4610	FBgn0034735	CG4610 gene product from transcript CG4610-RA	YES	NO	NO
CG4752	FBgn0034733	CG4752 gene product from transcript CG4752-RA	NO	NO	YES	NO
CG4763	FBgn0034910	CG4763 gene product from transcript CG4763-RA	NO	NO	NO
CG4797	FBgn0034909	CG4797 gene product from transcript CG4797-RB	NO	NO	YES	lethal
CG4882	FBgn0025336	CG4882 gene product from transcript CG4882-RB	YES	NO	YES	YES
CG5339	FBgn0034925	CG5339 gene product from transcript CG5339-RA	NO	NO	NO
CG5532	FBgn0034902	CG5532 gene product from transcript CG5532-RB	NO	NO	NO
CG5539	FBgn0034907	CG5539 gene product from transcript CG5539-RB	NO	NO	NO
CG5543	FBgn0034908	CG5543 gene product from transcript CG5543-RA	YES	NO	YES	lethal
CG5549	FBgn0034911	CG5549 gene product from transcript CG5549-RB	NO	NO	NO
CG5554	FBgn0034914	CG5554 gene product from transcript CG5554-RB	NO	NO	NO
CG5569	FBgn0034919	CG5569 gene product from transcript CG5569-RA	NO	NO	NO
CG5597	FBgn0034920	CG5597 gene product from transcript CG5597-RA	NO	NO	NO
CG5819	FBgn0034717	CG5819 gene product from transcript CG5819-RC	NO	YES	YES	NO
CG6044	FBgn0034725	CG6044 gene product from transcript CG6044-RG	NO	NO	NO
CG6613	FBgn0034694	CG6613 gene product from transcript CG6613-RA	NO	NO	NO
CG7791	FBgn0033038	CG7791 gene product from transcript CG7791-RA	NO	NO	NO
CG7849	FBgn0033060	CG7849 gene product from transcript CG7849-RB	NO	NO	NO
CG7856	FBgn0033056	CG7856 gene product from transcript CG7856-RA	NO	NO	NO
CG7881	FBgn0033048	CG7881 gene product from transcript CG7881-RB	NO	YES	YES	NO
CG7882	FBgn0033047	CG7882 gene product from transcript CG7882-RC	NO	YES	YES	NO
CG9304	FBgn0034674	CG9304 gene product from transcript CG9304-RB	NO	NO	YES	NO
CG9410	FBgn0033086	CG9410 gene product from transcript CG9410-RA	YES	NO	YES	NO
CG9422	FBgn0033092	CG9422 gene product from transcript CG9422-RC	NO	NO	NO
CG9436	FBgn0033101	CG9436 gene product from transcript CG9436-RA	NO	NO	YES	NO
CG9812	FBgn0034860	CG9812 gene product from transcript CG9812-RB	NO	YES	NO
CG9815	FBgn0034861	CG9815 gene product from transcript CG9815-RD	NO	YES	NO
CG9825	FBgn0034783	CG9825 gene product from transcript CG9825-RA	YES	NO	YES	NO
CG9826	FBgn0034784	CG9826 gene product from transcript CG9826-RC	YES	NO	YES	NO
CG9849	FBgn0034803	CG9849 gene product from transcript CG9849-RA	NO	NO	YES	NO
CG9850	FBgn0034903	CG9850 gene product from transcript CG9850-RC	NO	YES	NO
CG9861	FBgn0034844	CG9861 gene product from transcript CG9861-RA	NO	NO	NO
CG9863	FBgn0034846	CG9863 gene product from transcript CG9863-RB	NO	NO	NO
CG9875	FBgn0034850	CG9875 gene product from transcript CG9875-RB	NO	NO	NO
CG9876	FBgn0034821	CG9876 gene product from transcript CG9876-RA	NO	NO	YES	NO
CG9890	FBgn0034814	CG9890 gene product from transcript CG9890-RA	NO	NO	YES	NO
CG9896	FBgn0034808	CG9896 gene product from transcript CG9896-RA	NO	NO	NO
CG9899	FBgn0034829	CG9899 gene product from transcript CG9899-RA	NO	NO	NO
Chi	FBgn0013764	Chip	NO	NO	NO
Cyp6a2	FBgn0000473	Cytochrome P450-6a2	YES	NO	YES	NO
Cyp6d2	FBgn0034756	CG4373 gene product from transcript CG4373-RA	YES	NO	YES	NO
dany	FBgn0050401	distal antenna-young	NO	NO	NO
Dcp-1	FBgn0010501	Death caspase-1	NO	NO	YES	NO
DCP1	FBgn0034921	Decapping protein 1	NO	NO	NO
Debcl	FBgn0029131	Death executioner Bcl-2 homologue	NO	NO	YES	NO
DNA-ligI	FBgn0262619	DNA ligase I	YES	NO	NO
dnr1	FBgn0260866	defense repressor 1	NO	YES	YES	NO
Dpit47	FBgn0266518	DNA polymerase interacting tpr containing protein of 47kD	NO	NO	YES	YES
dve	FBgn0020307	defective proventriculus	NO	NO	NO
Eb1	FBgn0027066	CG3265 gene product from transcript CG3265-RF	NO	NO	NO
egl	FBgn0000562	egalitarian	NO	NO	YES	NO
Eglp2	FBgn0034883	Entomoglyceroporin 2	NO	NO	NO
Eglp3	FBgn0034884	Entomoglyceroporin 3	NO	YES	NO
Eglp4	FBgn0034885	Entomoglyceroporin 4	NO	NO	NO
eIF-5A	FBgn0034967	CG3186 gene product from transcript CG3186-RB	NO	NO	NO
eIF2B-delta	FBgn0034858	CG10315 gene product from transcript CG10315-RA	NO	NO	NO
EMC8-9	FBgn0034791	ER Membrane protein Complex 8-9	NO	NO	NO
Epac	FBgn0085421	Exchange protein directly activated by cAMP ortholog (H. sapiens)	NO	NO	YES	NO
fd59A	FBgn0004896	forkhead domain 59A	NO	NO	YES	NO
Fib	FBgn0003062	Fibrillarin	YES	NO	YES	lethal
Fmo-2	FBgn0033079	Flavin-containing monooxygenase 2	NO	NO	YES	NO
Galphas	FBgn0001123	G protein alpha s subunit	NO	NO	NO
gammaSnap1	FBgn0028552	gamma Soluble NSF attachment protein 1	NO	NO	NO
gas	FBgn0034736	gasoline	NO	YES	NO
gbb	FBgn0024234	glass bottom boat	NO	NO	YES	NO
gek	FBgn0023081	genghis khan	NO	NO	YES	NO
geminin	FBgn0033081	CG3183 gene product from transcript CG3183-RA	NO	NO	NO
GlcT-1	FBgn0067102	Ceramide glucosyltransferase	NO	YES	YES	YES
GM130	FBgn0034697	Golgi matrix protein 130 kD ortholog	NO	NO	NO
Gmer	FBgn0267823	GDP-4-keto-6-deoxy-D-mannose 3,5-epimerase/4-reductase	NO	NO	NO
Golgin245	FBgn0034854	Golgin-245 ortholog (H. sapiens)	NO	NO	NO
gom	FBgn0029084	gomdanji	NO	NO	NO
Gp150	FBgn0013272	CG5820 gene product from transcript CG5820-RC	NO	YES	YES	NO
Gp210	FBgn0266580	Gp210 ortholog (H. sapiens)	YES	NO	NO
Gr58a	FBgn0041239	Gustatory receptor 58a	NO	NO	YES	NO
Gr58b	FBgn0041238	Gustatory receptor 58b	NO	NO	NO
Gr58c	FBgn0041237	Gustatory receptor 58c	NO	NO	NO
Gr59a	FBgn0045483	Gustatory receptor 59a	NO	NO	NO
Gr59b	FBgn0045482	Gustatory receptor 59b	NO	NO	YES	NO
Gr59c	FBgn0041235	Gustatory receptor 59c	NO	NO	NO
Gr59e	FBgn0041233	Gustatory receptor 59e	NO	NO	NO
Gr59f	FBgn0041234	Gustatory receptor 59f	NO	NO	NO
HP1Lcsd	FBgn0263084	Heterochromatin Protein 1L chromoshadow domain	NO	NO	NO
Hsepi	FBgn0033087	Heparan sulfate C5-epimerase	NO	NO	NO
HSPC300	FBgn0061198	CG30173 gene product from transcript CG30173-RB	NO	NO	NO
Ice1	FBgn0034853	Interacts with the C terminus of ELL 1	NO	NO	NO
IM18	FBgn0067903	Immune induced molecule 18	NO	NO	NO
inaD	FBgn0001263	inactivation no afterpotential D	NO	NO	NO
IntS1	FBgn0034964	Integrator 1	NO	YES	NO
ItgaPS5	FBgn0034880	Integrin alphaPS5 subunit	NO	NO	NO
jbug	FBgn0028371	jitterbug	NO	NO	NO
jeb	FBgn0086677	jelly belly	NO	NO	NO
jing	FBgn0086655	CG9397 gene product from transcript CG9397-RI	NO	NO	YES	NO
Klp59C	FBgn0034824	Kinesin-like protein at 59C	NO	NO	NO
Klp59D	FBgn0034827	Kinesin-like protein at 59D	NO	NO	NO
l(2)01289	FBgn0010482	lethal (2) 01289	YES	NO	YES	NO
l(2)06496	FBgn0010622	Dynactin 3 p24 subunit	NO	NO	NO
l(2)dtl	FBgn0013548	lethal-(2)-denticleless	YES	NO	YES	NO
l(2)efl	FBgn0011296	lethal (2) essential for life	NO	NO	NO
l(2)k09848	FBgn0284246	lethal (2) k09848	NO	NO	NO
l(2)k09913	FBgn0021979	lethal (2) k09913	NO	NO	NO
l(2)not	FBgn0011297	lethal (2) neighbor of tid	NO	NO	NO
l(2)tid	FBgn0002174	lethal (2) tumorous imaginal discs	NO	NO	NO
Liprin-gamma	FBgn0034720	CG11206 gene product from transcript CG11206-RA	NO	NO	NO
Lpt	FBgn0263667	Lost PHDs of trr	NO	NO	NO
LS2	FBgn0034834	Large Subunit 2	NO	NO	NO
MAN1	FBgn0034962	CG3167 gene product from transcript CG3167-RC	NO	NO	YES	NO
MED16	FBgn0034707	Mediator complex subunit 16	NO	NO	NO
MED23	FBgn0034795	Mediator complex subunit 23	YES	NO	YES	NO
mei-S332	FBgn0002715	meiotic from via Salaria 332	NO	NO	NO
Mes4	FBgn0034726	Mesoderm-expressed 4	NO	NO	YES	NO
MFS1	FBgn0050272	Major Facilitator Superfamily Transporter 1	NO	YES	NO
mi	FBgn0261786	minus	NO	NO	NO
mle	FBgn0002774	maleless	NO	NO	NO
mr	FBgn0002791	morula	YES	NO	YES	lethal
mRpL43	FBgn0034893	mitochondrial ribosomal protein L43	YES	NO	YES	YES
mRpS29	FBgn0034727	mitochondrial ribosomal protein S29	YES	NO	YES	NO
nahoda	FBgn0034797	CG12781 gene product from transcript CG12781-RC	NO	NO	NO
Nap1	FBgn0015268	Nucleosome assembly protein 1	NO	NO	YES	NO
Not11	FBgn0034963	CG13567 gene product from transcript CG13567-RC	NO	NO	NO
nsr	FBgn0034740	novel spermatogenesis regulator	NO	NO	NO
NtR	FBgn0029147	CG6698 gene product from transcript CG6698-RA	NO	NO	NO
Nup214	FBgn0010660	Nucleoporin 214kD	NO	NO	NO
Nxt1	FBgn0028411	NTF2-related export protein 1	NO	NO	YES	NO
Obp58b	FBgn0034768	Odorant-binding protein 58b	NO	NO	NO
Obp58d	FBgn0034770	Odorant-binding protein 58d	NO	NO	NO
Obp59a	FBgn0034766	Odorant-binding protein 59a	NO	NO	NO
Opbp	FBgn0050443	Optix-binding protein	NO	YES	NO
or	FBgn0003008	orange	NO	NO	NO
Or42a	FBgn0033041	Odorant receptor 42a	NO	NO	NO
Or42b	FBgn0033043	Odorant receptor 42b	NO	NO	NO
Or59a	FBgn0026384	Odorant receptor 59a	NO	NO	NO
Or59b	FBgn0034865	Odorant receptor 59b	NO	NO	NO
Or59c	FBgn0034866	Odorant receptor 59c	NO	NO	NO
Orcokinin	FBgn0034935	CG13565 gene product from transcript CG13565-RA	NO	NO	NO
ord	FBgn0003009	orientation disruptor	NO	NO	NO
Pal2	FBgn0262728	Peptidyl-alpha-hydroxyglycine-alpha-amidating lyase 2	NO	NO	NO
Pask	FBgn0034950	PAS kinase	NO	NO	YES	NO
Pde8	FBgn0266377	Phosphodiesterase 8	NO	NO	YES	NO
PebIII	FBgn0011695	Ejaculatory bulb protein III	NO	NO	NO
PGAP3	FBgn0033088	Post-GPI attachment to proteins 3 ortholog (H. sapiens)	YES	NO	YES	NO
pgc	FBgn0016053	polar granule component	NO	NO	NO
PHDP	FBgn0025334	Putative homeodomain protein	NO	NO	NO
Phm	FBgn0019948	Peptidylglycine-alpha-hydroxylating monooxygenase	NO	NO	NO
phtf	FBgn0028579	CG3268 gene product from transcript CG3268-RA	NO	NO	YES	NO
Pi3K59F	FBgn0015277	Phosphotidylinositol 3 kinase 59F	NO	YES	YES	YES
PIP5K59B	FBgn0034789	Phosphatidylinositol 4-phosphate 5-kinase at 59B	NO	NO	NO
Pngl	FBgn0033050	PNGase-like	NO	NO	NO
Ppa	FBgn0020257	Partner of paired	NO	NO	YES	NO
ppk12	FBgn0034730	pickpocket 12	NO	NO	NO
ppk29	FBgn0034965	pickpocket 29	NO	NO	NO
ppk3	FBgn0050181	pickpocket 3	NO	NO	NO
ppk9	FBgn0085398	pickpocket 9	NO	NO	NO
PPO3	FBgn0261363	Prophenoloxidase 3	NO	NO	NO
PPP1R15	FBgn0034948	Protein phosphatase 1 regulatory subunit 15	NO	NO	YES	YES
px	FBgn0003175	plexus	NO	NO	NO
qkr58E-1	FBgn0022986	quaking related 58E-1	YES	NO	YES	NO
qkr58E-2	FBgn0022985	quaking related 58E-2	YES	NO	YES	NO
qkr58E-3	FBgn0022984	quaking related 58E-3	NO	NO	NO
Rab2	FBgn0014009	CG3269 gene product from transcript CG3269-RA	NO	NO	YES	NO
RabX1	FBgn0015372	CG3870 gene product from transcript CG3870-RA	NO	NO	YES	NO
rad50	FBgn0034728	CG6339 gene product from transcript CG6339-RE	NO	YES	YES
Rap2l	FBgn0025806	Ras-associated protein 2-like	NO	NO	NO
Reep1	FBgn0261564	REEP1 homolog	NO	YES	NO
retn	FBgn0004795	retained	NO	NO	YES	NO
robo1	FBgn0005631	roundabout 1	NO	NO	NO
roh	FBgn0250838	reduction of Rh1	NO	NO	NO
Rpi	FBgn0050410	Ribose-5-phosphate isomerase	NO	NO	YES	NO
RpL12	FBgn0034968	Ribosomal protein L12	NO	NO	NO
RpL22-like	FBgn0034837	Ribosomal protein L22-like	YES	NO	NO
RpL23	FBgn0010078	Ribosomal protein L23	NO	NO	NO
RpL39	FBgn0023170	Ribosomal protein L39	NO	NO	NO
RpS16	FBgn0034743	Ribosomal protein S16	NO	NO	NO
RpS24	FBgn0261596	Ribosomal protein S24	NO	NO	NO
Rrp4	FBgn0034879	CG3931 gene product from transcript CG3931-RA	NO	NO	NO
Rtf1	FBgn0034722	CG10955 gene product from transcript CG10955-RB	NO	NO	YES	NO
RYBP	FBgn0034763	Ring and YY1 Binding Protein	NO	NO	NO
sced	FBgn0013732	scrambled	NO	NO	NO
SdhB	FBgn0014028	Succinate dehydrogenase, subunit B (iron-sulfur)	NO	NO	NO
sei	FBgn0003353	seizure	YES	NO	YES	NO
SERCA	FBgn0263006	Sarco/endoplasmic reticulum Ca(2+)-ATPase	YES	NO	YES	YES
Sesn	FBgn0034897	Sestrin	NO	YES	YES	NO
shu	FBgn0003401	shutdown	NO	NO	YES	NO
sigmar	FBgn0034894	salivary glands marred	NO	NO	NO
SkpF	FBgn0034863	SKP1-related F	NO	NO	NO
SmydA-5	FBgn0033061	SET and MYND domain containing arthropod-specific member 5	NO	NO	NO
Snap29	FBgn0034913	Synaptosomal-associated protein 29kDa	NO	YES	NO
Snp	FBgn0265192	Snipper	YES	NO	NO
Src42A	FBgn0264959	Src oncogene at 42A	NO	NO	YES	NO
Ssrp	FBgn0010278	Structure specific recognition protein	NO	NO	NO
St1	FBgn0034887	Sulfotransferase 1	NO	NO	NO
St3	FBgn0265052	Sulfotransferase 3	NO	NO	NO
Strica	FBgn0033051	Ser/Thr-rich caspase	NO	NO	NO
Swim	FBgn0034709	Secreted Wg-interacting molecule	NO	NO	NO
T3dh	FBgn0017482	Type III alcohol dehydrogenase	NO	NO	YES	NO
Taldo	FBgn0023477	Transaldolase	NO	NO	YES	YES
Tbce	FBgn0033055	Tubulin-specific chaperone E	NO	NO	NO
TBPH	FBgn0025790	TAR DNA-binding protein-43 homolog	NO	NO	YES	NO
tbrd-3	FBgn0050417	testis-specifically expressed bromodomain containing protein-3	NO	NO	NO
Tdc1	FBgn0259977	Tyrosine decarboxylase 1	NO	NO	YES	NO
Tdc2	FBgn0050446	Tyrosine decarboxylase 2	YES	NO	YES	NO
Ten-a	FBgn0267001	Tenascin accessory	NO	NO	NO
Thiolase	FBgn0025352	CG4581 gene product from transcript CG4581-RA	NO	NO	YES	NO
thoc5	FBgn0034939	CG2980 gene product from transcript CG2980-RA	YES	NO	YES	NO
TM4sF	FBgn0020372	Transmembrane 4 superfamily	NO	NO	NO
Trap1	FBgn0026761	CG3152 gene product from transcript CG3152-RA	NO	NO	YES	NO
Tsp42A	FBgn0033042	Tetraspanin 42A	NO	NO	NO
tsr	FBgn0011726	twinstar	NO	NO	NO
twi	FBgn0003900	twist	NO	NO	NO
ubl	FBgn0022224	ubiquitin like	YES	NO	NO
Ugt58Fa	FBgn0040091	CG4414 gene product from transcript CG4414-RB	NO	NO	NO
Unc-89	FBgn0053519	CG33519 gene product from transcript CG33519-RH	NO	NO	YES	NO
VepD	FBgn0053200	Ventrally-expressed protein D	NO	NO	NO
Vha16-1	FBgn0262736	Vacuolar H[+] ATPase 16kD subunit 1	NO	NO	NO
vir	FBgn0003977	virilizer	NO	NO	NO
Vps20	FBgn0034744	Vacuolar protein sorting 20	NO	NO	NO
Vps35	FBgn0034708	Vacuolar protein sorting 35	NO	NO	NO
Vrp1	FBgn0243516	Verprolin 1	NO	NO	NO
wdp	FBgn0034718	windpipe	NO	NO	NO
wrapper	FBgn0025878	CG10382 gene product from transcript CG10382-RA	NO	NO	NO
yellow-d	FBgn0041712	CG9889 gene product from transcript CG9889-RA	NO	YES	NO
yellow-d2	FBgn0034856	CG9891 gene product from transcript CG9891-RA	NO	NO	NO
yip3	FBgn0040063	yippee interacting protein 3	NO	NO	YES	NO
yki	FBgn0034970	yorkie	NO	NO	YES	NO
ytr	FBgn0021895	yantar	NO	NO	NO
ZnT41F	FBgn0025693	Zinc transporter 41F	YES	NO	YES	NO

## Sheet: Sheet1
name	kk	gd	bloomington
bonsai	104412 kk
CG13551		31786 GD
CG4250	101949 kk
CG42566	-		67587
CG5543	106320 kk
jing	-		55633
l(2)dtl	109907 kk
MED23	105247 kk
mr	106986 kk
mRpL43	104466 kk
mRpS29		34670 GD
Pask	107025 kk (lethal)	25662 GD	29581
		25661 GD
PGAP3		3985 GD
qkr58E-1		26332 GD
qkr58E-2	106944 kk
sei	104698 kk
SERCA	107446 kk	4474 GD	25928
			44581
TBPH	104401 kk
Tdc2	-		25871
thoc5	110174 kk
ZnT41F	107931 kk
Gbb	100011 kk
