# Supplementary figures and images for: Natural variation in sugar tolerance associates with changes in signaling and mitochondrial ribosome biogenesis
Source: eLife journal article supplement (doi:10.7554/elife.40841), 2018-11-27

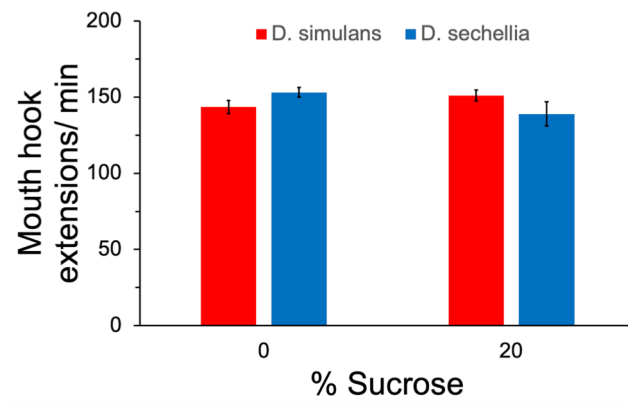

Supplement: supp [file elife_poa_e40841_Figure_1_figure_supplement_1.pdf › elife_poa_e40841_Figure_1_figure_supplement_1.pdf]

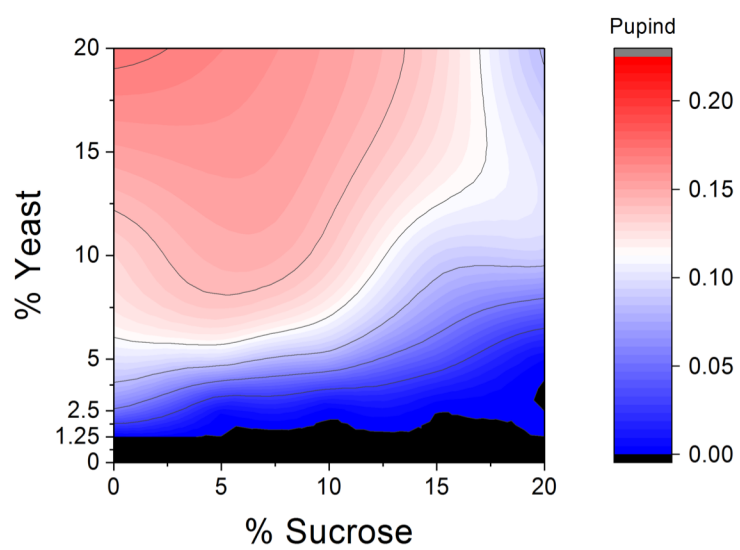

Supplement: supp [file elife_poa_e40841_Figure_6_figure_supplement_1.pdf › elife_poa_e40841_Figure_6_figure_supplement_1.pdf]

**A**

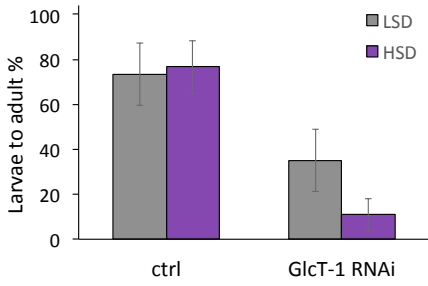

**B**

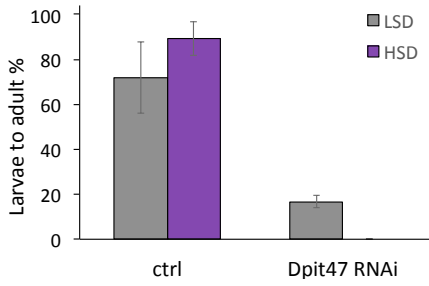

**C**

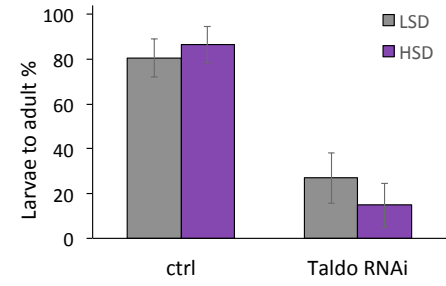

Supplement: supp [file elife_poa_e40841_Figure_7_figure_supplement_1.pdf › elife_poa_e40841_Figure_7_figure_supplement_1.pdf]

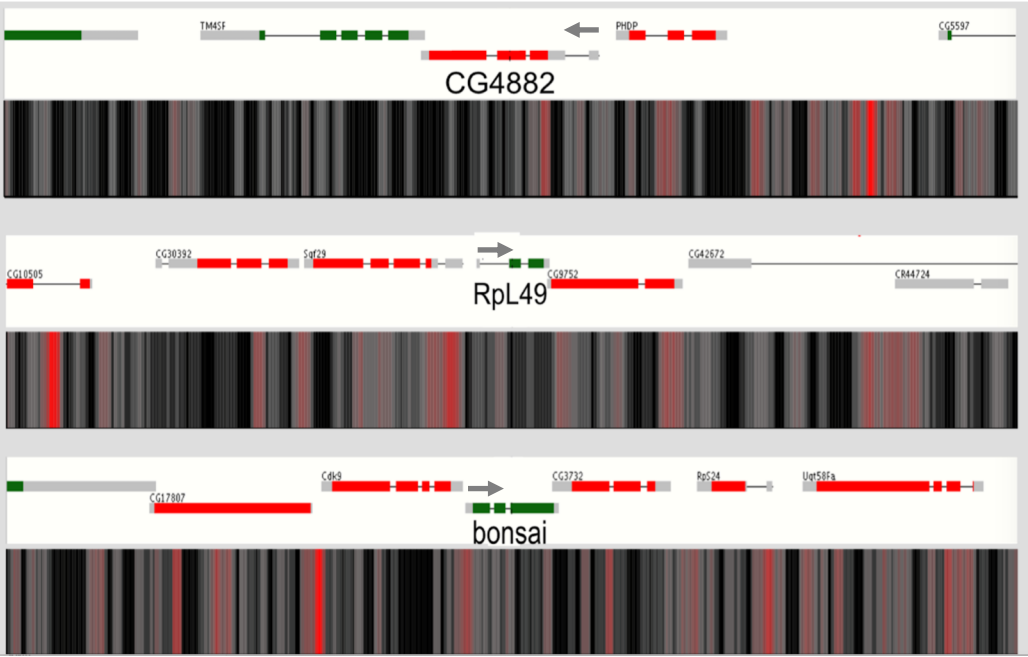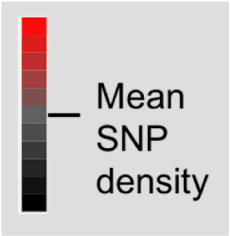

Supplement: supp [file elife_poa_e40841_Figure_8_figure_supplement_1.pdf › elife_poa_e40841_Figure_8_figure_supplement_1.pdf]

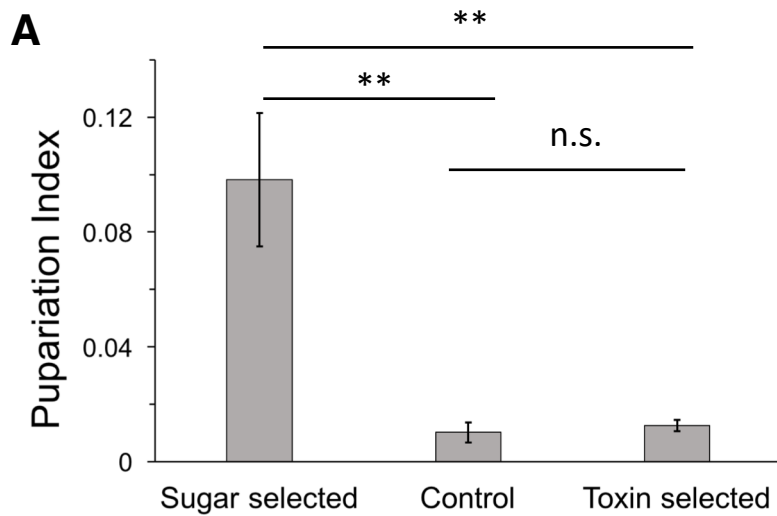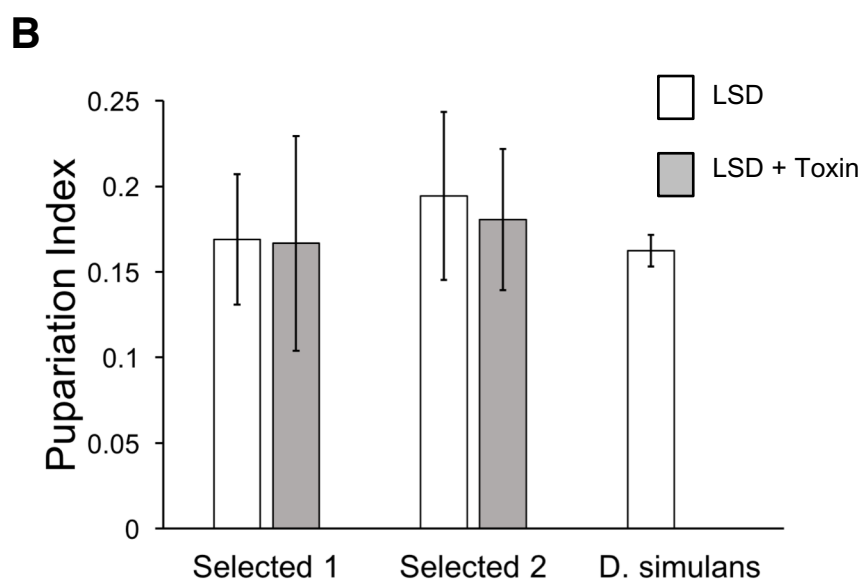

Supplement: supp [file elife_poa_e40841_Figure_9_figure_supplement_1.pdf › elife_poa_e40841_Figure_9_figure_supplement_1.pdf]
